# Supplementary material for: Modelling the Effect of Water Removal by Reverse Osmosis on the Distillation of Mixtures of Short-Chain Organic Acids from Anaerobic Fermentation
Source: MDPI journal article supplement (doi:10.3390/pr11082362), 2023-08-05
Supplement: s1 [file s1]

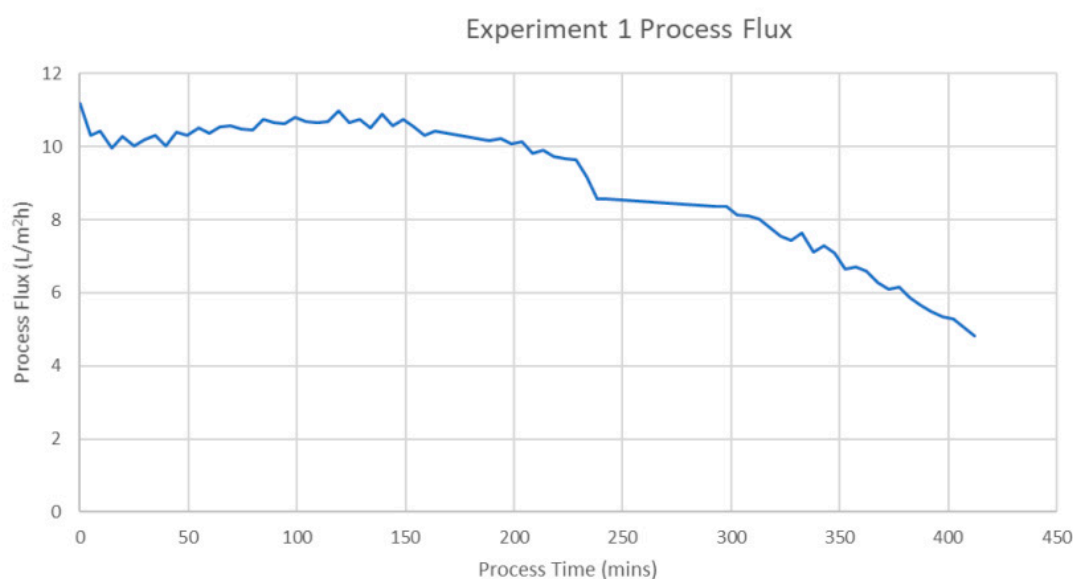

**Figure S1.** Process flux in preliminary experiments with AF effluents and RO membranes. The RO membrane was GE AE, with circular disk of 76 mm used in a dead-end filtration cell. The pressure applied was 60 bar and the clean water flux was  $14.7 \text{ L m}^{-2} \text{ h}^{-1}$  at 60 bar. The sample was the effluent of lab-scale AF process, with a total SCOA concentration of 7.4 g/L, mainly composed of acetic and lactic acids. The conductivity of the feed was 4.48 mS, of the overall concentrate was 17.64 mS and of the overall permeate was 0.161 mS.

More experimental information is available from: S. Simonetti (2022). Anaerobic fermentation of food waste for the production of chemicals. Chapter 7. Concentration of fermentation products via reverse osmosis membrane filtration. PhD thesis, University of Aberdeen.

The membrane filtration experiments were conducted by the company Membranology LTD, C/O Azets, Ty Caer Wyr Charter Court, Phoenix Way, Enterprise Park, Swansea, United Kingdom, SA7 9FS.

**Table S1.** Simulation results for steams 1-8 in the process scheme (Figure 1, main body of the manuscript). Conditions indicated as “-” refer to columns which were not simulated, i.e. column 1 for total concentration of SCOAs 100 g/kg and water removed 900 t/d (no water to be removed by distillation) and column 3 for composition 3 (only acetic and propionic acids).

| Composition 1, 10 g/kg. Water removed by RO membranes (t/d): 0<br>Reflux ratios for columns 1, 2, 3: 0.55, 16, 3.8, respectively.   |       |       |         |        |        |        |        |        |
|-------------------------------------------------------------------------------------------------------------------------------------|-------|-------|---------|--------|--------|--------|--------|--------|
| Variable                                                                                                                            | 1     | 2     | 3       | 4      | 5      | 6      | 7      | 8      |
| Temperature (°C)                                                                                                                    | 25    | 25    | 99.66   | 181.90 | 117.49 | 201.40 | 140.80 | 216.13 |
| Total flow rate (t/d)                                                                                                               | 1,000 | 1,000 | 990     | 10     | 1      | 9      | 1      | 8      |
| Composition (% w/w)                                                                                                                 |       |       |         |        |        |        |        |        |
| Acetic                                                                                                                              | 0.10  | 0.10  | 0       | 9.941  | 99.00  | 0.05   | 0.419  | 0      |
| Lactic                                                                                                                              | 0.80  | 0.80  | 0       | 80.00  | 0      | 88.89  | 0.580  | 99.93  |
| Propionic                                                                                                                           | 0.10  | 0.10  | 0       | 0.10   | 0.412  | 11.06  | 99.00  | 0.07   |
| Water                                                                                                                               | 99.00 | 99.00 | 99.9994 | 0.059  | 0.586  | 0      | 0      | 0      |
| Composition 1, 10 g/kg. Water removed by RO membranes (t/d): 100<br>Reflux ratios for columns 1, 2, 3: 0.55, 16, 3.8, respectively. |       |       |         |        |        |        |        |        |
| Variable                                                                                                                            | 1     | 2     | 3       | 4      | 5      | 6      | 7      | 8      |
| Temperature (°C)                                                                                                                    | 25    | 25    | 99.66   | 181.91 | 117.49 | 201.43 | 140.80 | 216.13 |
| Total flow rate (t/d)                                                                                                               | 1,000 | 900   | 890     | 10     | 1      | 9      | 1      | 8      |
| Composition (% w/w)                                                                                                                 |       |       |         |        |        |        |        |        |
| Acetic                                                                                                                              | 0.10  | 0.111 | 0.0007  | 9.942  | 99.00  | 0.0465 | 0.419  | 0      |
| Lactic                                                                                                                              | 0.80  | 0.888 | 0       | 80.00  | 0      | 88.89  | 0.580  | 99.93  |
| Propionic                                                                                                                           | 0.10  | 0.111 | 0       | 10.00  | 0.419  | 11.06  | 99.00  | 0.07   |
| Water                                                                                                                               | 99.00 | 98.89 | 99.9993 | 0.058  | 0.579  | 0      | 0      | 0      |
| Composition 1, 10 g/kg. Water removed by RO membranes (t/d): 200<br>Reflux ratios for columns 1, 2, 3: 0.54, 16, 3.8, respectively. |       |       |         |        |        |        |        |        |
| Variable                                                                                                                            | 1     | 2     | 3       | 4      | 5      | 6      | 7      | 8      |
| Temperature (°C)                                                                                                                    | 25    | 25    | 99.66   | 181.91 | 117.49 | 201.43 | 140.80 | 216.13 |
| Total flow rate (t/d)                                                                                                               | 1,000 | 800   | 790     | 10     | 1      | 9      | 1      | 8      |
| Composition (% w/w)                                                                                                                 |       |       |         |        |        |        |        |        |
| Acetic                                                                                                                              | 0.10  | 0.125 | 0.0007  | 9.942  | 99.00  | 0.0465 | 0.419  | 0      |
| Lactic                                                                                                                              | 0.80  | 1.00  | 0       | 80.00  | 0      | 88.89  | 0.580  | 99.93  |
| Propionic                                                                                                                           | 0.10  | 0.125 | 0       | 10.00  | 0.419  | 11.06  | 99.00  | 0.07   |
| Water                                                                                                                               | 99.00 | 98.75 | 99.9993 | 0.058  | 0.580  | 0      | 0      | 0      |
| Composition 1, 10 g/kg. Water removed by RO membranes (t/d): 300<br>Reflux ratios for columns 1, 2, 3: 0.53, 16, 3.8, respectively. |       |       |         |        |        |        |        |        |
| Variable                                                                                                                            | 1     | 2     | 3       | 4      | 5      | 6      | 7      | 8      |
| Temperature (°C)                                                                                                                    | 25    | 25    | 99.66   | 181.91 | 117.49 | 201.40 | 140.80 | 216.12 |
| Total flow rate (t/d)                                                                                                               | 1,000 | 700   | 690     | 10     | 1      | 9      | 1      | 8      |
| Composition (% w/w)                                                                                                                 |       |       |         |        |        |        |        |        |
| Acetic                                                                                                                              | 0.10  | 0.143 | 0.0008  | 9.942  | 99.00  | 0.0465 | 0.419  | 0      |
| Lactic                                                                                                                              | 0.80  | 1.143 | 0       | 80.00  | 0      | 88.89  | 0.581  | 99.93  |
| Propionic                                                                                                                           | 0.10  | 0.143 | 0       | 10.00  | 0.419  | 11.06  | 99.00  | 0.07   |
| Water                                                                                                                               | 99.00 | 98.57 | 99.9992 | 0.058  | 0.580  | 0      | 0      | 0      |
| Composition 1, 10 g/kg. Water removed by RO membranes (t/d): 400<br>Reflux ratios for columns 1, 2, 3: 0.52, 16, 3.8, respectively. |       |       |         |        |        |        |        |        |
| Variable                                                                                                                            | 1     | 2     | 3       | 4      | 5      | 6      | 7      | 8      |
| Temperature (°C)                                                                                                                    | 25    | 25    | 99.66   | 181.91 | 117.49 | 201.40 | 140.80 | 216.12 |
| Total flow rate (t/d)                                                                                                               | 1,000 | 600   | 590     | 10     | 1      | 9      | 1      | 8      |
| Composition (% w/w)                                                                                                                 |       |       |         |        |        |        |        |        |
| Acetic                                                                                                                              | 0.10  | 0.167 | 0.001   | 9.942  | 99.00  | 0.0465 | 0.419  | 0      |
| Lactic                                                                                                                              | 0.80  | 1.33  | 0       | 80.00  | 0      | 88.89  | 0.581  | 99.93  |
| Propionic                                                                                                                           | 0.10  | 0.167 | 0       | 10.00  | 0.419  | 11.06  | 99.00  | 0.07   |
| Water                                                                                                                               | 99.00 | 98.33 | 99.999  | 0.058  | 0.580  | 0      | 0      | 0      |

| Composition 1, 10 g/kg. Water removed by RO membranes (t/d): 500<br>Reflux ratios for columns 1, 2, 3: 0.51, 16, 3.8, respectively. |       |       |         |        |        |        |        |        |
|-------------------------------------------------------------------------------------------------------------------------------------|-------|-------|---------|--------|--------|--------|--------|--------|
| Variable                                                                                                                            | 1     | 2     | 3       | 4      | 5      | 6      | 7      | 8      |
| Temperature (°C)                                                                                                                    | 25    | 25    | 99.66   | 181.91 | 117.49 | 201.40 | 140.80 | 216.12 |
| Total flow rate (t/d)                                                                                                               | 1,000 | 500   | 490     | 10     | 1      | 9      | 1      | 8      |
| Composition (% w/w)                                                                                                                 |       |       |         |        |        |        |        |        |
| Acetic                                                                                                                              | 0.10  | 0.20  | 0.0012  | 9.942  | 99.00  | 0.0465 | 0.419  | 0      |
| Lactic                                                                                                                              | 0.80  | 1.60  | 0       | 80.00  | 0      | 88.89  | 0.581  | 99.93  |
| Propionic                                                                                                                           | 0.10  | 0.20  | 0       | 10.00  | 0.419  | 11.06  | 99.00  | 0.07   |
| Water                                                                                                                               | 99.00 | 98.00 | 99.9988 | 0.058  | 0.580  | 0      | 0      | 0      |
| Composition 1, 10 g/kg. Water removed by RO membranes (t/d): 600<br>Reflux ratios for columns 1, 2, 3: 0.49, 16, 3.8, respectively. |       |       |         |        |        |        |        |        |
| Variable                                                                                                                            | 1     | 2     | 3       | 4      | 5      | 6      | 7      | 8      |
| Temperature (°C)                                                                                                                    | 25    | 25    | 99.66   | 181.91 | 117.49 | 201.40 | 140.80 | 216.12 |
| Total flow rate (t/d)                                                                                                               | 1,000 | 400   | 390     | 10     | 1      | 9      | 1      | 8      |
| Composition (% w/w)                                                                                                                 |       |       |         |        |        |        |        |        |
| Acetic                                                                                                                              | 0.10  | 0.25  | 0.0015  | 9.942  | 99.00  | 0.0465 | 0.419  | 0      |
| Lactic                                                                                                                              | 0.80  | 2.00  | 0       | 80.00  | 0      | 88.89  | 0.581  | 99.93  |
| Propionic                                                                                                                           | 0.10  | 0.25  | 0       | 10.00  | 0.419  | 11.06  | 99.00  | 0.07   |
| Water                                                                                                                               | 99.00 | 97.50 | 99.9985 | 0.058  | 0.580  | 0      | 0      | 0      |
| Composition 1, 10 g/kg. Water removed by RO membranes (t/d): 700<br>Reflux ratios for columns 1, 2, 3: 0.47, 16, 3.8, respectively. |       |       |         |        |        |        |        |        |
| Variable                                                                                                                            | 1     | 2     | 3       | 4      | 5      | 6      | 7      | 8      |
| Temperature (°C)                                                                                                                    | 25    | 25    | 99.66   | 181.91 | 117.49 | 201.40 | 140.80 | 216.12 |
| Total flow rate (t/d)                                                                                                               | 1,000 | 300   | 290     | 10     | 1      | 9      | 1      | 8      |
| Composition (% w/w)                                                                                                                 |       |       |         |        |        |        |        |        |
| Acetic                                                                                                                              | 0.10  | 0.33  | 0.0020  | 9.942  | 99.00  | 0.0465 | 0.419  | 0      |
| Lactic                                                                                                                              | 0.80  | 2.67  | 0       | 80.00  | 0      | 88.89  | 0.581  | 99.93  |
| Propionic                                                                                                                           | 0.10  | 0.33  | 0       | 10.00  | 0.419  | 11.06  | 99.00  | 0.07   |
| Water                                                                                                                               | 99.00 | 96.67 | 99.998  | 0.058  | 0.580  | 0      | 0      | 0      |
| Composition 1, 10 g/kg. Water removed by RO membranes (t/d): 800<br>Reflux ratios for columns 1, 2, 3: 0.45, 16, 3.8, respectively. |       |       |         |        |        |        |        |        |
| Variable                                                                                                                            | 1     | 2     | 3       | 4      | 5      | 6      | 7      | 8      |
| Temperature (°C)                                                                                                                    | 25    | 25    | 99.66   | 181.91 | 117.49 | 201.40 | 140.80 | 216.12 |
| Total flow rate (t/d)                                                                                                               | 1,000 | 200   | 190     | 10     | 1      | 9      | 1      | 8      |
| Composition (% w/w)                                                                                                                 |       |       |         |        |        |        |        |        |
| Acetic                                                                                                                              | 0.10  | 0.50  | 0.0031  | 9.942  | 99.00  | 0.0465 | 0.419  | 0      |
| Lactic                                                                                                                              | 0.80  | 4.00  | 0       | 80.00  | 0      | 88.89  | 0.581  | 99.93  |
| Propionic                                                                                                                           | 0.10  | 0.50  | 0       | 10.00  | 0.419  | 11.06  | 99.00  | 0.07   |
| Water                                                                                                                               | 99.00 | 95.00 | 99.9969 | 0.058  | 0.580  | 0      | 0      | 0      |
| Composition 1, 10 g/kg. Water removed by RO membranes (t/d): 900<br>Reflux ratios for columns 1, 2, 3: 0.41, 16, 3.8, respectively. |       |       |         |        |        |        |        |        |
| Variable                                                                                                                            | 1     | 2     | 3       | 4      | 5      | 6      | 7      | 8      |
| Temperature (°C)                                                                                                                    | 25    | 25    | 99.66   | 181.91 | 117.49 | 201.40 | 140.80 | 216.12 |
| Total flow rate (t/d)                                                                                                               | 1,000 | 100   | 90      | 10     | 1      | 9      | 1      | 8      |
| Composition (% w/w)                                                                                                                 |       |       |         |        |        |        |        |        |
| Acetic                                                                                                                              | 0.10  | 1.00  | 0.0065  | 9.942  | 99.00  | 0.0465 | 0.419  | 0      |
| Lactic                                                                                                                              | 0.80  | 8.00  | 0       | 80.00  | 0      | 88.89  | 0.581  | 99.93  |
| Propionic                                                                                                                           | 0.10  | 1.00  | 0       | 9.999  | 0.419  | 11.06  | 99.00  | 0.07   |
| Water                                                                                                                               | 99.00 | 90.00 | 99.9935 | 0.0584 | 0.584  | 0      | 0      | 0      |

| Composition 1, 50 g/kg. Water removed by RO membranes (t/d): 0   |       |        |         |        |        |        |        |        |
|------------------------------------------------------------------|-------|--------|---------|--------|--------|--------|--------|--------|
| Reflux ratios for columns 1, 2, 3: 0.45, 16, 3.8, respectively.  |       |        |         |        |        |        |        |        |
| Variable                                                         | 1     | 2      | 3       | 4      | 5      | 6      | 7      | 8      |
| Temperature (°C)                                                 | 25    | 25     | 99.66   | 181.91 | 117.49 | 201.40 | 140.80 | 216.12 |
| Total flow rate (t/d)                                            | 1,000 | 1,000  | 950     | 50     | 5      | 45     | 5      | 40     |
| Composition (% w/w)                                              |       |        |         |        |        |        |        |        |
| Acetic                                                           | 0.50  | 0.50   | 0.0031  | 9.942  | 99.00  | 0.0465 | 0.419  | 0      |
| Lactic                                                           | 4.00  | 4.00   | 0       | 80.00  | 0      | 88.89  | 0.580  | 99.93  |
| Propionic                                                        | 0.50  | 0.50   | 0       | 10.00  | 0.419  | 11.06  | 99.00  | 0.07   |
| Water                                                            | 95.00 | 95.00  | 99.9969 | 0.058  | 0.580  | 0      | 0      | 0      |
| Composition 1, 50 g/kg. Water removed by RO membranes (t/d): 100 |       |        |         |        |        |        |        |        |
| Reflux ratios for columns 1, 2, 3: 0.44, 16, 3.8, respectively.  |       |        |         |        |        |        |        |        |
| Variable                                                         | 1     | 2      | 3       | 4      | 5      | 6      | 7      | 8      |
| Temperature (°C)                                                 | 25    | 25     | 99.66   | 181.91 | 117.49 | 201.40 | 140.80 | 216.12 |
| Total flow rate (t/d)                                            | 1,000 | 900    | 850     | 50     | 5      | 45     | 5      | 40     |
| Composition (% w/w)                                              |       |        |         |        |        |        |        |        |
| Acetic                                                           | 0.50  | 0.555  | 0.0034  | 9.942  | 99.00  | 0.0465 | 0.419  | 0      |
| Lactic                                                           | 4.00  | 4.444  | 0       | 80.00  | 0      | 88.89  | 0.580  | 99.93  |
| Propionic                                                        | 0.50  | 0.555  | 0       | 10.00  | 0.419  | 11.06  | 99.00  | 0.07   |
| Water                                                            | 95.00 | 94.444 | 99.9966 | 0.058  | 0.580  | 0      | 0      | 0      |
| Composition 1, 50 g/kg. Water removed by RO membranes (t/d): 200 |       |        |         |        |        |        |        |        |
| Reflux ratios for columns 1, 2, 3: 0.44, 16, 3.8, respectively.  |       |        |         |        |        |        |        |        |
| Variable                                                         | 1     | 2      | 3       | 4      | 5      | 6      | 7      | 8      |
| Temperature (°C)                                                 | 25    | 25     | 99.66   | 181.91 | 117.49 | 201.40 | 140.80 | 216.12 |
| Total flow rate (t/d)                                            | 1,000 | 800    | 750     | 50     | 5      | 45     | 5      | 40     |
| Composition (% w/w)                                              |       |        |         |        |        |        |        |        |
| Acetic                                                           | 0.50  | 0.625  | 0.0038  | 9.942  | 99.00  | 0.0465 | 0.419  | 0      |
| Lactic                                                           | 4.00  | 5.00   | 0       | 80.00  | 0      | 88.89  | 0.580  | 99.93  |
| Propionic                                                        | 0.50  | 0.625  | 0       | 10.00  | 0.419  | 11.06  | 99.00  | 0.07   |
| Water                                                            | 95.00 | 93.75  | 99.9962 | 0.058  | 0.580  | 0      | 0      | 0      |
| Composition 1, 50 g/kg. Water removed by RO membranes (t/d): 300 |       |        |         |        |        |        |        |        |
| Reflux ratios for columns 1, 2, 3: 0.43, 16, 3.8, respectively.  |       |        |         |        |        |        |        |        |
| Variable                                                         | 1     | 2      | 3       | 4      | 5      | 6      | 7      | 8      |
| Temperature (°C)                                                 | 25    | 25     | 99.66   | 181.91 | 117.49 | 201.40 | 140.80 | 216.12 |
| Total flow rate (t/d)                                            | 1,000 | 700    | 650     | 50     | 5      | 45     | 5      | 40     |
| Composition (% w/w)                                              |       |        |         |        |        |        |        |        |
| Acetic                                                           | 0.50  | 0.714  | 0.0045  | 9.942  | 99.00  | 0.0465 | 0.419  | 0      |
| Lactic                                                           | 4.00  | 5.71   | 0       | 80.00  | 0      | 88.89  | 0.580  | 99.93  |
| Propionic                                                        | 0.50  | 0.714  | 0       | 10.00  | 0.419  | 11.06  | 99.00  | 0.07   |
| Water                                                            | 95.00 | 92.86  | 99.9955 | 0.058  | 0.580  | 0      | 0      | 0      |
| Composition 1, 50 g/kg. Water removed by RO membranes (t/d): 400 |       |        |         |        |        |        |        |        |
| Reflux ratios for columns 1, 2, 3: 0.42, 16, 3.8, respectively.  |       |        |         |        |        |        |        |        |
| Variable                                                         | 1     | 2      | 3       | 4      | 5      | 6      | 7      | 8      |
| Temperature (°C)                                                 | 25    | 25     | 99.66   | 181.91 | 117.49 | 201.40 | 140.80 | 216.12 |
| Total flow rate (t/d)                                            | 1,000 | 600    | 550     | 50     | 5      | 45     | 5      | 40     |
| Composition (% w/w)                                              |       |        |         |        |        |        |        |        |
| Acetic                                                           | 0.50  | 0.83   | 0.0053  | 9.942  | 99.00  | 0.0465 | 0.419  | 0      |
| Lactic                                                           | 4.00  | 6.67   | 0       | 80.00  | 0      | 88.89  | 0.580  | 99.93  |
| Propionic                                                        | 0.50  | 0.83   | 0       | 10.00  | 0.419  | 11.06  | 99.00  | 0.07   |
| Water                                                            | 95.00 | 91.67  | 99.9947 | 0.058  | 0.580  | 0      | 0      | 0      |

| Composition 1, 50 g/kg. Water removed by RO membranes (t/d): 500<br>Reflux ratios for columns 1, 2, 3: 0.41, 16, 3.8, respectively. |       |       |         |        |        |        |        |        |
|-------------------------------------------------------------------------------------------------------------------------------------|-------|-------|---------|--------|--------|--------|--------|--------|
| Variable                                                                                                                            | 1     | 2     | 3       | 4      | 5      | 6      | 7      | 8      |
| Temperature (°C)                                                                                                                    | 25    | 25    | 99.66   | 181.91 | 117.49 | 201.40 | 140.80 | 216.12 |
| Total flow rate (t/d)                                                                                                               | 1,000 | 500   | 450     | 50     | 5      | 45     | 5      | 40     |
| Composition (% w/w)                                                                                                                 |       |       |         |        |        |        |        |        |
| Acetic                                                                                                                              | 0.50  | 1.00  | 0.0065  | 9.942  | 99.00  | 0.0465 | 0.419  | 0      |
| Lactic                                                                                                                              | 4.00  | 8.00  | 0       | 80.00  | 0      | 88.89  | 0.580  | 99.93  |
| Propionic                                                                                                                           | 0.50  | 1.00  | 0       | 10.00  | 0.419  | 11.06  | 99.00  | 0.07   |
| Water                                                                                                                               | 95.00 | 90.00 | 99.9935 | 0.058  | 0.580  | 0      | 0      | 0      |
| Composition 1, 50 g/kg. Water removed by RO membranes (t/d): 600<br>Reflux ratios for columns 1, 2, 3: 0.40, 16, 3.8, respectively. |       |       |         |        |        |        |        |        |
| Variable                                                                                                                            | 1     | 2     | 3       | 4      | 5      | 6      | 7      | 8      |
| Temperature (°C)                                                                                                                    | 25    | 25    | 99.66   | 181.91 | 117.49 | 201.40 | 140.80 | 216.12 |
| Total flow rate (t/d)                                                                                                               | 1,000 | 400   | 350     | 50     | 5      | 45     | 5      | 40     |
| Composition (% w/w)                                                                                                                 |       |       |         |        |        |        |        |        |
| Acetic                                                                                                                              | 0.50  | 1.25  | 0.0083  | 9.942  | 99.00  | 0.0465 | 0.419  | 0      |
| Lactic                                                                                                                              | 4.00  | 10.00 | 0       | 80.00  | 0      | 88.89  | 0.580  | 99.93  |
| Propionic                                                                                                                           | 0.50  | 1.25  | 0       | 10.00  | 0.419  | 11.06  | 99.00  | 0.07   |
| Water                                                                                                                               | 95.00 | 87.50 | 99.9917 | 0.058  | 0.580  | 0      | 0      | 0      |
| Composition 1, 50 g/kg. Water removed by RO membranes (t/d): 700<br>Reflux ratios for columns 1, 2, 3: 0.39, 16, 3.8, respectively. |       |       |         |        |        |        |        |        |
| Variable                                                                                                                            | 1     | 2     | 3       | 4      | 5      | 6      | 7      | 8      |
| Temperature (°C)                                                                                                                    | 25    | 25    | 99.66   | 181.91 | 117.49 | 201.40 | 140.80 | 216.12 |
| Total flow rate (t/d)                                                                                                               | 1,000 | 300   | 250     | 50     | 5      | 45     | 5      | 40     |
| Composition (% w/w)                                                                                                                 |       |       |         |        |        |        |        |        |
| Acetic                                                                                                                              | 0.50  | 1.67  | 0.0116  | 9.942  | 99.00  | 0.0465 | 0.419  | 0      |
| Lactic                                                                                                                              | 4.00  | 13.33 | 0       | 80.00  | 0      | 88.89  | 0.580  | 99.93  |
| Propionic                                                                                                                           | 0.50  | 1.67  | 0       | 10.00  | 0.419  | 11.06  | 99.00  | 0.07   |
| Water                                                                                                                               | 95.00 | 83.33 | 99.9984 | 0.058  | 0.580  | 0      | 0      | 0      |
| Composition 1, 50 g/kg. Water removed by RO membranes (t/d): 800<br>Reflux ratios for columns 1, 2, 3: 0.38, 16, 3.8, respectively. |       |       |         |        |        |        |        |        |
| Variable                                                                                                                            | 1     | 2     | 3       | 4      | 5      | 6      | 7      | 8      |
| Temperature (°C)                                                                                                                    | 25    | 25    | 99.66   | 181.93 | 117.49 | 201.40 | 140.80 | 216.12 |
| Total flow rate (t/d)                                                                                                               | 1,000 | 200   | 150     | 50     | 5      | 45     | 5      | 40     |
| Composition (% w/w)                                                                                                                 |       |       |         |        |        |        |        |        |
| Acetic                                                                                                                              | 0.50  | 2.50  | 0.0189  | 9.942  | 99.00  | 0.0465 | 0.419  | 0      |
| Lactic                                                                                                                              | 4.00  | 20.00 | 0       | 80.00  | 0      | 88.89  | 0.580  | 99.93  |
| Propionic                                                                                                                           | 0.50  | 2.50  | 0       | 10.00  | 0.419  | 11.06  | 99.00  | 0.07   |
| Water                                                                                                                               | 95.00 | 75.00 | 99.9811 | 0.058  | 0.580  | 0      | 0      | 0      |
| Composition 1, 50 g/kg. Water removed by RO membranes (t/d): 900<br>Reflux ratios for columns 1, 2, 3: 0.38, 16, 3.8, respectively. |       |       |         |        |        |        |        |        |
| Variable                                                                                                                            | 1     | 2     | 3       | 4      | 5      | 6      | 7      | 8      |
| Temperature (°C)                                                                                                                    | 25    | 25    | 99.66   | 181.97 | 117.50 | 201.40 | 140.80 | 216.12 |
| Total flow rate (t/d)                                                                                                               | 1,000 | 100   | 50      | 50     | 5      | 45     | 5      | 40     |
| Composition (% w/w)                                                                                                                 |       |       |         |        |        |        |        |        |
| Acetic                                                                                                                              | 0.50  | 5     | 0.0535  | 9.942  | 99.00  | 0.0465 | 0.419  | 0      |
| Lactic                                                                                                                              | 4.00  | 40    | 0       | 80.00  | 0      | 88.89  | 0.580  | 99.93  |
| Propionic                                                                                                                           | 0.50  | 5     | 0       | 10.00  | 0.419  | 11.06  | 99.00  | 0.07   |
| Water                                                                                                                               | 95.00 | 50    | 99.9465 | 0.058  | 0.580  | 0      | 0      | 0      |

| Composition 1, 100 g/kg. Water removed by RO membranes (t/d): 0<br>Reflux ratios for columns 1, 2, 3: 0.41, 16, 3.8, respectively.   |       |       |         |        |        |        |        |        |
|--------------------------------------------------------------------------------------------------------------------------------------|-------|-------|---------|--------|--------|--------|--------|--------|
| Variable                                                                                                                             | 1     | 2     | 3       | 4      | 5      | 6      | 7      | 8      |
| Temperature (°C)                                                                                                                     | 25    | 25    | 99.66   | 181.91 | 117.49 | 201.40 | 140.80 | 216.12 |
| Total flow rate (t/d)                                                                                                                | 1,000 | 1,000 | 900     | 100    | 10     | 90     | 10     | 80     |
| Composition (% w/w)                                                                                                                  |       |       |         |        |        |        |        |        |
| Acetic                                                                                                                               | 1.00  | 1.00  | 0.0065  | 9.942  | 99.00  | 0.0465 | 0.419  | 0      |
| Lactic                                                                                                                               | 8.00  | 8.00  | 0       | 80.00  | 0      | 88.89  | 0.581  | 99.93  |
| Propionic                                                                                                                            | 1.00  | 1.00  | 0       | 10.00  | 0.584  | 11.06  | 99.00  | 0.07   |
| Water                                                                                                                                | 90.00 | 90.00 | 99.9935 | 0.0584 | 0.419  | 0      | 0      | 0      |
| Composition 1, 100 g/kg. Water removed by RO membranes (t/d): 100<br>Reflux ratios for columns 1, 2, 3: 0.41, 16, 3.8, respectively. |       |       |         |        |        |        |        |        |
| Variable                                                                                                                             | 1     | 2     | 3       | 4      | 5      | 6      | 7      | 8      |
| Temperature (°C)                                                                                                                     | 25    | 25    | 99.66   | 181.91 | 117.49 | 201.40 | 140.80 | 216.12 |
| Total flow rate (t/d)                                                                                                                | 1,000 | 900   | 800     | 100    | 10     | 90     | 10     | 80     |
| Composition (% w/w)                                                                                                                  |       |       |         |        |        |        |        |        |
| Acetic                                                                                                                               | 1.00  | 1.11  | 0.0072  | 9.942  | 99.00  | 0.0465 | 0.419  | 0      |
| Lactic                                                                                                                               | 8.00  | 8.89  | 0       | 80.00  | 0      | 88.89  | 0.581  | 99.93  |
| Propionic                                                                                                                            | 1.00  | 1.11  | 0       | 10.00  | 0.584  | 11.06  | 99.00  | 0.07   |
| Water                                                                                                                                | 90.00 | 88.89 | 99.9928 | 0.0584 | 0.419  | 0      | 0      | 0      |
| Composition 1, 100 g/kg. Water removed by RO membranes (t/d): 200<br>Reflux ratios for columns 1, 2, 3: 0.40, 16, 3.8, respectively. |       |       |         |        |        |        |        |        |
| Variable                                                                                                                             | 1     | 2     | 3       | 4      | 5      | 6      | 7      | 8      |
| Temperature (°C)                                                                                                                     | 25    | 25    | 99.66   | 181.91 | 117.49 | 201.40 | 140.80 | 216.12 |
| Total flow rate (t/d)                                                                                                                | 1,000 | 800   | 700     | 100    | 10     | 90     | 10     | 80     |
| Composition (% w/w)                                                                                                                  |       |       |         |        |        |        |        |        |
| Acetic                                                                                                                               | 1.00  | 1.25  | 0.0083  | 9.942  | 99.00  | 0.0465 | 0.419  | 0      |
| Lactic                                                                                                                               | 8.00  | 10.00 | 0       | 80.00  | 0      | 88.89  | 0.581  | 99.93  |
| Propionic                                                                                                                            | 1.00  | 1.25  | 0       | 10.00  | 0.584  | 11.06  | 99.00  | 0.07   |
| Water                                                                                                                                | 90.00 | 87.5  | 99.9917 | 0.0584 | 0.419  | 0      | 0      | 0      |
| Composition 1, 100 g/kg. Water removed by RO membranes (t/d): 300<br>Reflux ratios for columns 1, 2, 3: 0.40, 16, 3.8, respectively. |       |       |         |        |        |        |        |        |
| Variable                                                                                                                             | 1     | 2     | 3       | 4      | 5      | 6      | 7      | 8      |
| Temperature (°C)                                                                                                                     | 25    | 25    | 99.66   | 181.91 | 117.49 | 201.40 | 140.80 | 216.12 |
| Total flow rate (t/d)                                                                                                                | 1,000 | 700   | 600     | 100    | 10     | 90     | 10     | 80     |
| Composition (% w/w)                                                                                                                  |       |       |         |        |        |        |        |        |
| Acetic                                                                                                                               | 1.00  | 1.43  | 0.0095  | 9.942  | 99.00  | 0.0465 | 0.419  | 0      |
| Lactic                                                                                                                               | 8.00  | 11.43 | 0       | 80.00  | 0      | 88.89  | 0.581  | 99.93  |
| Propionic                                                                                                                            | 1.00  | 1.43  | 0       | 10.00  | 0.584  | 11.06  | 99.00  | 0.07   |
| Water                                                                                                                                | 90.00 | 85.71 | 99.9905 | 0.0584 | 0.419  | 0      | 0      | 0      |
| Composition 1, 100 g/kg. Water removed by RO membranes (t/d): 400<br>Reflux ratios for columns 1, 2, 3: 0.39, 16, 3.8, respectively. |       |       |         |        |        |        |        |        |
| Variable                                                                                                                             | 1     | 2     | 3       | 4      | 5      | 6      | 7      | 8      |
| Temperature (°C)                                                                                                                     | 25    | 25    | 99.66   | 181.91 | 117.49 | 201.40 | 140.80 | 216.12 |
| Total flow rate (t/d)                                                                                                                | 1,000 | 600   | 500     | 100    | 10     | 90     | 10     | 80     |
| Composition (% w/w)                                                                                                                  |       |       |         |        |        |        |        |        |
| Acetic                                                                                                                               | 1.00  | 1.67  | 0.0116  | 9.942  | 99.00  | 0.0465 | 0.419  | 0      |
| Lactic                                                                                                                               | 8.00  | 13.33 | 0       | 80.00  | 0      | 88.89  | 0.581  | 99.93  |
| Propionic                                                                                                                            | 1.00  | 1.67  | 0       | 10.00  | 0.584  | 11.06  | 99.00  | 0.07   |
| Water                                                                                                                                | 90.00 | 83.33 | 99.9884 | 0.0584 | 0.419  | 0      | 0      | 0      |

| Composition 1, 100 g/kg. Water removed by RO membranes (t/d): 500<br>Reflux ratios for columns 1, 2, 3: 0.38, 16, 3.8, respectively. |       |       |         |        |        |        |        |        |
|--------------------------------------------------------------------------------------------------------------------------------------|-------|-------|---------|--------|--------|--------|--------|--------|
| Variable                                                                                                                             | 1     | 2     | 3       | 4      | 5      | 6      | 7      | 8      |
| Temperature (°C)                                                                                                                     | 25    | 25    | 99.66   | 181.91 | 117.49 | 201.40 | 140.80 | 216.12 |
| Total flow rate (t/d)                                                                                                                | 1,000 | 500   | 400     | 100    | 10     | 90     | 10     | 80     |
| Composition (% w/w)                                                                                                                  |       |       |         |        |        |        |        |        |
| Acetic                                                                                                                               | 1.00  | 2.00  | 0.0146  | 9.942  | 99.00  | 0.0465 | 0.419  | 0      |
| Lactic                                                                                                                               | 8.00  | 16.00 | 0       | 80.00  | 0      | 88.89  | 0.581  | 99.93  |
| Propionic                                                                                                                            | 1.00  | 2.00  | 0       | 10.00  | 0.584  | 11.06  | 99.00  | 0.07   |
| Water                                                                                                                                | 90.00 | 80.00 | 99.9854 | 0.0584 | 0.419  | 0      | 0      | 0      |
| Composition 1, 100 g/kg. Water removed by RO membranes (t/d): 600<br>Reflux ratios for columns 1, 2, 3: 0.38, 16, 3.8, respectively. |       |       |         |        |        |        |        |        |
| Variable                                                                                                                             | 1     | 2     | 3       | 4      | 5      | 6      | 7      | 8      |
| Temperature (°C)                                                                                                                     | 25    | 25    | 99.66   | 181.93 | 117.49 | 201.40 | 140.80 | 216.12 |
| Total flow rate (t/d)                                                                                                                | 1,000 | 400   | 300     | 100    | 10     | 90     | 10     | 80     |
| Composition (% w/w)                                                                                                                  |       |       |         |        |        |        |        |        |
| Acetic                                                                                                                               | 1.00  | 2.50  | 0.0188  | 9.942  | 99.00  | 0.0465 | 0.419  | 0      |
| Lactic                                                                                                                               | 8.00  | 20.00 | 0       | 80.00  | 0      | 88.89  | 0.581  | 99.93  |
| Propionic                                                                                                                            | 1.00  | 2.50  | 0       | 10.00  | 0.584  | 11.06  | 99.00  | 0.07   |
| Water                                                                                                                                | 90.00 | 75.00 | 99.9811 | 0.0584 | 0.419  | 0      | 0      | 0      |
| Composition 1, 100 g/kg. Water removed by RO membranes (t/d): 700<br>Reflux ratios for columns 1, 2, 3: 0.37, 16, 3.8, respectively. |       |       |         |        |        |        |        |        |
| Variable                                                                                                                             | 1     | 2     | 3       | 4      | 5      | 6      | 7      | 8      |
| Temperature (°C)                                                                                                                     | 25    | 25    | 99.66   | 181.91 | 117.49 | 201.40 | 140.80 | 216.12 |
| Total flow rate (t/d)                                                                                                                | 1,000 | 300   | 200     | 100    | 10     | 90     | 10     | 80     |
| Composition (% w/w)                                                                                                                  |       |       |         |        |        |        |        |        |
| Acetic                                                                                                                               | 1.00  | 3.33  | 0.0287  | 9.942  | 99.00  | 0.0465 | 0.419  | 0      |
| Lactic                                                                                                                               | 8.00  | 26.67 | 0       | 80.00  | 0      | 88.89  | 0.581  | 99.93  |
| Propionic                                                                                                                            | 1.00  | 3.33  | 0       | 10.00  | 0.584  | 11.06  | 99.00  | 0.07   |
| Water                                                                                                                                | 90.00 | 66.67 | 99.9713 | 0.0584 | 0.419  | 0      | 0      | 0      |
| Composition 1, 100 g/kg. Water removed by RO membranes (t/d): 800<br>Reflux ratios for columns 1, 2, 3: 0.38, 16, 3.8, respectively. |       |       |         |        |        |        |        |        |
| Variable                                                                                                                             | 1     | 2     | 3       | 4      | 5      | 6      | 7      | 8      |
| Temperature (°C)                                                                                                                     | 25    | 25    | 99.66   | 181.97 | 117.49 | 201.40 | 140.80 | 216.12 |
| Total flow rate (t/d)                                                                                                                | 1,000 | 200   | 100     | 100    | 10     | 90     | 10     | 80     |
| Composition (% w/w)                                                                                                                  |       |       |         |        |        |        |        |        |
| Acetic                                                                                                                               | 1.00  | 5.00  | 0.0535  | 9.942  | 99.00  | 0.0465 | 0.419  | 0      |
| Lactic                                                                                                                               | 8.00  | 40.00 | 0       | 80.00  | 0      | 88.89  | 0.581  | 99.93  |
| Propionic                                                                                                                            | 1.00  | 5.00  | 0       | 10.00  | 0.584  | 11.06  | 99.00  | 0.07   |
| Water                                                                                                                                | 90.00 | 50.00 | 99.9465 | 0.0584 | 0.419  | 0      | 0      | 0      |
| Composition 1, 100 g/kg. Water removed by RO membranes (t/d): 900<br>Reflux ratios for columns 2, 3: 5.1, 7                          |       |       |         |        |        |        |        |        |
| Variable                                                                                                                             | 1     | 2     | 3       | 4      | 5      | 6      | 7      | 8      |
| Temperature (°C)                                                                                                                     | 25    | 25    | -       | -      | 117.75 | 201.33 | 140.41 | 216.23 |
| Total flow rate (t/d)                                                                                                                | 1,000 | 100   | -       | -      | 10     | 90     | 10     | 80     |
| Composition (% w/w)                                                                                                                  |       |       |         |        |        |        |        |        |
| Acetic                                                                                                                               | 1.00  | 10.00 | -       | -      | 99.00  | 0.11   | 0.992  | 0      |
| Lactic                                                                                                                               | 8.00  | 80.00 | -       | -      | 0      | 88.89  | 0      | 100    |
| Propionic                                                                                                                            | 1.00  | 10.00 | -       | -      | 0.992  | 11.00  | 99.00  | 0      |
| Water                                                                                                                                | 90.00 | 0     | -       | -      | 0      | 0      | 0      | 0      |

| Composition 2, 10 g/kg. Water removed by RO membranes (t/d): 0   |       |       |         |        |        |        |        |        |
|------------------------------------------------------------------|-------|-------|---------|--------|--------|--------|--------|--------|
| Reflux ratios for columns 1, 2, 3: 0.61, 16, 1.5, respectively.  |       |       |         |        |        |        |        |        |
| Variable                                                         | 1     | 2     | 3       | 4      | 5      | 6      | 7      | 8      |
| Temperature (°C)                                                 | 25    | 25    | 99.66   | 141.49 | 117.37 | 178.30 | 140.63 | 216.23 |
| Total flow rate (t/d)                                            | 1,000 | 1,000 | 990     | 10     | 4      | 6      | 2      | 4      |
| Composition (% w/w)                                              |       |       |         |        |        |        |        |        |
| Acetic                                                           | 0.40  | 0.40  | 0.0035  | 39.66  | 99.00  | 0.095  | 0.285  | 0      |
| Lactic                                                           | 0.40  | 0.40  | 0       | 40.00  | 0      | 66.67  | 0      | 0      |
| Propionic                                                        | 0.20  | 0.20  | 0       | 20.00  | 0.142  | 33.24  | 99.72  | 100    |
| Water                                                            | 99.00 | 99.00 | 99.9965 | 0.34   | 0.86   | 0      | 0      | 0      |
| Composition 2, 10 g/kg. Water removed by RO membranes (t/d): 100 |       |       |         |        |        |        |        |        |
| Reflux ratios for columns 1, 2, 3: 0.61, 16, 1.5, respectively.  |       |       |         |        |        |        |        |        |
| Variable                                                         | 1     | 2     | 3       | 4      | 5      | 6      | 7      | 8      |
| Temperature (°C)                                                 | 25    | 25    | 99.66   | 141.49 | 117.37 | 178.30 | 140.63 | 216.23 |
| Total flow rate (t/d)                                            | 1,000 | 900   | 890     | 10     | 4      | 6      | 2      | 4      |
| Composition (% w/w)                                              |       |       |         |        |        |        |        |        |
| Acetic                                                           | 0.40  | 0.44  | 0.0038  | 39.66  | 99.00  | 0.095  | 0.285  | 0      |
| Lactic                                                           | 0.40  | 0.44  | 0       | 40.00  | 0      | 66.67  | 0      | 0      |
| Propionic                                                        | 0.20  | 0.22  | 0       | 20.00  | 0.142  | 33.24  | 99.72  | 100    |
| Water                                                            | 99.00 | 98.89 | 99.9962 | 0.34   | 0.86   | 0      | 0      | 0      |
| Composition 2, 10 g/kg. Water removed by RO membranes (t/d): 200 |       |       |         |        |        |        |        |        |
| Reflux ratios for columns 1, 2, 3: 0.60, 16, 1.5, respectively.  |       |       |         |        |        |        |        |        |
| Variable                                                         | 1     | 2     | 3       | 4      | 5      | 6      | 7      | 8      |
| Temperature (°C)                                                 | 25    | 25    | 99.66   | 141.49 | 117.37 | 178.30 | 140.63 | 216.23 |
| Total flow rate (t/d)                                            | 1,000 | 800   | 790     | 10     | 4      | 6      | 2      | 4      |
| Composition (% w/w)                                              |       |       |         |        |        |        |        |        |
| Acetic                                                           | 0.40  | 0.50  | 0.0043  | 39.66  | 99.00  | 0.095  | 0.285  | 0      |
| Lactic                                                           | 0.40  | 0.50  | 0       | 40.00  | 0      | 66.67  | 0      | 0      |
| Propionic                                                        | 0.20  | 2.5   | 0       | 20.00  | 0.142  | 33.24  | 99.72  | 100    |
| Water                                                            | 99.00 | 98.75 | 99.9957 | 0.34   | 0.86   | 0      | 0      | 0      |
| Composition 2, 10 g/kg. Water removed by RO membranes (t/d): 300 |       |       |         |        |        |        |        |        |
| Reflux ratios for columns 1, 2, 3: 0.59, 16, 1.5, respectively.  |       |       |         |        |        |        |        |        |
| Variable                                                         | 1     | 2     | 3       | 4      | 5      | 6      | 7      | 8      |
| Temperature (°C)                                                 | 25    | 25    | 99.66   | 141.49 | 117.37 | 178.30 | 140.63 | 216.23 |
| Total flow rate (t/d)                                            | 1,000 | 700   | 690     | 10     | 4      | 6      | 2      | 4      |
| Composition (% w/w)                                              |       |       |         |        |        |        |        |        |
| Acetic                                                           | 0.40  | 0.572 | 0.0050  | 39.66  | 99.00  | 0.095  | 0.285  | 0      |
| Lactic                                                           | 0.40  | 0.572 | 0       | 40.00  | 0      | 66.67  | 0      | 0      |
| Propionic                                                        | 0.20  | 0.286 | 0       | 20.00  | 0.142  | 33.24  | 99.72  | 100    |
| Water                                                            | 99.00 | 98.57 | 99.9950 | 0.34   | 0.86   | 0      | 0      | 0      |
| Composition 2, 10 g/kg. Water removed by RO membranes (t/d): 400 |       |       |         |        |        |        |        |        |
| Reflux ratios for columns 1, 2, 3: 0.58, 16, 1.5, respectively.  |       |       |         |        |        |        |        |        |
| Variable                                                         | 1     | 2     | 3       | 4      | 5      | 6      | 7      | 8      |
| Temperature (°C)                                                 | 25    | 25    | 99.66   | 141.49 | 117.37 | 178.30 | 140.63 | 216.23 |
| Total flow rate (t/d)                                            | 1,000 | 600   | 590     | 10     | 4      | 6      | 2      | 4      |
| Composition (% w/w)                                              |       |       |         |        |        |        |        |        |
| Acetic                                                           | 0.40  | 0.67  | 0.0058  | 39.66  | 99.00  | 0.095  | 0.285  | 0      |
| Lactic                                                           | 0.40  | 0.67  | 0       | 40.00  | 0      | 66.67  | 0      | 0      |
| Propionic                                                        | 0.20  | 0.33  | 0       | 20.00  | 0.142  | 33.24  | 99.72  | 100    |
| Water                                                            | 99.00 | 98.33 | 99.9942 | 0.34   | 0.86   | 0      | 0      | 0      |



| Composition 2, 10 g/kg. Water removed by RO membranes (t/d): 500<br>Reflux ratios for columns 1, 2, 3: 0.57, 16, 1.5, respectively. |       |       |         |        |        |        |        |        |
|-------------------------------------------------------------------------------------------------------------------------------------|-------|-------|---------|--------|--------|--------|--------|--------|
| Variable                                                                                                                            | 1     | 2     | 3       | 4      | 5      | 6      | 7      | 8      |
| Temperature (°C)                                                                                                                    | 25    | 25    | 99.66   | 141.49 | 117.37 | 178.30 | 140.63 | 216.23 |
| Total flow rate (t/d)                                                                                                               | 1,000 | 500   | 490     | 10     | 4      | 6      | 2      | 4      |
| Composition (% w/w)                                                                                                                 |       |       |         |        |        |        |        |        |
| Acetic                                                                                                                              | 0.40  | 0.80  | 0.0070  | 39.66  | 99.00  | 0.095  | 0.285  | 0      |
| Lactic                                                                                                                              | 0.40  | 0.80  | 0       | 40.00  | 0      | 66.67  | 0      | 0      |
| Propionic                                                                                                                           | 0.20  | 0.40  | 0       | 20.00  | 0.142  | 33.24  | 99.72  | 100    |
| Water                                                                                                                               | 99.00 | 98.00 | 99.9930 | 0.34   | 0.86   | 0      | 0      | 0      |
| Composition 2, 10 g/kg. Water removed by RO membranes (t/d): 600<br>Reflux ratios for columns 1, 2, 3: 0.55, 16, 1.5, respectively. |       |       |         |        |        |        |        |        |
| Variable                                                                                                                            | 1     | 2     | 3       | 4      | 5      | 6      | 7      | 8      |
| Temperature (°C)                                                                                                                    | 25    | 25    | 99.66   | 141.49 | 117.37 | 178.30 | 140.63 | 216.23 |
| Total flow rate (t/d)                                                                                                               | 1,000 | 400   | 390     | 10     | 4      | 6      | 2      | 4      |
| Composition (% w/w)                                                                                                                 |       |       |         |        |        |        |        |        |
| Acetic                                                                                                                              | 0.40  | 1.00  | 0.0088  | 39.66  | 99.00  | 0.095  | 0.285  | 0      |
| Lactic                                                                                                                              | 0.40  | 1.00  | 0       | 40.00  | 0      | 66.67  | 0      | 0      |
| Propionic                                                                                                                           | 0.20  | 0.50  | 0       | 20.00  | 0.142  | 33.24  | 99.72  | 100    |
| Water                                                                                                                               | 99.00 | 97.50 | 99.9912 | 0.34   | 0.86   | 0      | 0      | 0      |
| Composition 2, 10 g/kg. Water removed by RO membranes (t/d): 700<br>Reflux ratios for columns 1, 2, 3: 0.54, 16, 1.5, respectively. |       |       |         |        |        |        |        |        |
| Variable                                                                                                                            | 1     | 2     | 3       | 4      | 5      | 6      | 7      | 8      |
| Temperature (°C)                                                                                                                    | 25    | 25    | 99.66   | 141.49 | 117.37 | 178.30 | 140.63 | 216.23 |
| Total flow rate (t/d)                                                                                                               | 1,000 | 300   | 290     | 10     | 4      | 6      | 2      | 4      |
| Composition (% w/w)                                                                                                                 |       |       |         |        |        |        |        |        |
| Acetic                                                                                                                              | 0.40  | 1.33  | 0.0118  | 39.66  | 99.00  | 0.095  | 0.285  | 0      |
| Lactic                                                                                                                              | 0.40  | 1.33  | 0       | 40.00  | 0      | 66.67  | 0      | 0      |
| Propionic                                                                                                                           | 0.20  | 0.67  | 0       | 20.00  | 0.142  | 33.24  | 99.72  | 100    |
| Water                                                                                                                               | 99.00 | 96.67 | 99.9882 | 0.34   | 0.86   | 0      | 0      | 0      |
| Composition 2, 10 g/kg. Water removed by RO membranes (t/d): 800<br>Reflux ratios for columns 1, 2, 3: 0.52, 16, 1.5, respectively. |       |       |         |        |        |        |        |        |
| Variable                                                                                                                            | 1     | 2     | 3       | 4      | 5      | 6      | 7      | 8      |
| Temperature (°C)                                                                                                                    | 25    | 25    | 99.66   | 141.49 | 117.37 | 178.30 | 140.63 | 216.23 |
| Total flow rate (t/d)                                                                                                               | 1,000 | 200   | 190     | 10     | 4      | 6      | 2      | 4      |
| Composition (% w/w)                                                                                                                 |       |       |         |        |        |        |        |        |
| Acetic                                                                                                                              | 0.40  | 2.00  | 0.0181  | 39.66  | 99.00  | 0.095  | 0.285  | 0      |
| Lactic                                                                                                                              | 0.40  | 2.00  | 0       | 40.00  | 0      | 66.67  | 0      | 0      |
| Propionic                                                                                                                           | 0.20  | 1.00  | 0       | 20.00  | 0.142  | 33.24  | 99.72  | 100    |
| Water                                                                                                                               | 99.00 | 95.00 | 99.9819 | 0.34   | 0.86   | 0      | 0      | 0      |
| Composition 2, 10 g/kg. Water removed by RO membranes (t/d): 900<br>Reflux ratios for columns 1, 2, 3: 0.50, 16, 1.5, respectively. |       |       |         |        |        |        |        |        |
| Variable                                                                                                                            | 1     | 2     | 3       | 4      | 5      | 6      | 7      | 8      |
| Temperature (°C)                                                                                                                    | 25    | 25    | 99.66   | 141.49 | 117.37 | 178.30 | 140.63 | 216.23 |
| Total flow rate (t/d)                                                                                                               | 1,000 | 100   | 90      | 10     | 4      | 6      | 2      | 4      |
| Composition (% w/w)                                                                                                                 |       |       |         |        |        |        |        |        |
| Acetic                                                                                                                              | 0.40  | 4.00  | 0.0382  | 39.66  | 99.00  | 0.095  | 0.285  | 0      |
| Lactic                                                                                                                              | 0.40  | 4.00  | 0       | 40.00  | 0      | 66.67  | 0      | 0      |
| Propionic                                                                                                                           | 0.20  | 2.00  | 0       | 20.00  | 0.142  | 33.24  | 99.72  | 100    |
| Water                                                                                                                               | 99.00 | 90.00 | 99.9617 | 0.34   | 0.86   | 0      | 0      | 0      |

| Composition 2, 50 g/kg. Water removed by RO membranes (t/d): 0   |       |       |         |        |        |        |        |        |
|------------------------------------------------------------------|-------|-------|---------|--------|--------|--------|--------|--------|
| Reflux ratios for columns 1, 2, 3: 0.52, 16, 1.5, respectively.  |       |       |         |        |        |        |        |        |
| Variable                                                         | 1     | 2     | 3       | 4      | 5      | 6      | 7      | 8      |
| Temperature (°C)                                                 | 25    | 25    | 99.66   | 141.49 | 117.37 | 178.30 | 140.63 | 216.23 |
| Total flow rate (t/d)                                            | 1,000 | 1,000 | 950     | 50     | 20     | 30     | 10     | 20     |
| Composition (% w/w)                                              |       |       |         |        |        |        |        |        |
| Acetic                                                           | 2.00  | 2.00  | 0.0181  | 39.66  | 99.00  | 0.095  | 0.285  | 0      |
| Lactic                                                           | 2.00  | 2.00  | 0       | 40.00  | 0      | 66.67  | 0      | 0      |
| Propionic                                                        | 1.00  | 1.00  | 0       | 20.00  | 0.142  | 33.24  | 99.72  | 100    |
| Water                                                            | 95.00 | 95.00 | 99.9819 | 0.34   | 0.86   | 0      | 0      | 0      |
| Composition 2, 50 g/kg. Water removed by RO membranes (t/d): 100 |       |       |         |        |        |        |        |        |
| Reflux ratios for columns 1, 2, 3: 0.52, 16, 1.5, respectively.  |       |       |         |        |        |        |        |        |
| Variable                                                         | 1     | 2     | 3       | 4      | 5      | 6      | 7      | 8      |
| Temperature (°C)                                                 | 25    | 25    | 99.66   | 141.49 | 117.37 | 178.30 | 140.63 | 216.23 |
| Total flow rate (t/d)                                            | 1,000 | 900   | 850     | 50     | 20     | 30     | 10     | 20     |
| Composition (% w/w)                                              |       |       |         |        |        |        |        |        |
| Acetic                                                           | 2.00  | 2.22  | 0.0201  | 39.66  | 99.00  | 0.095  | 0.285  | 0      |
| Lactic                                                           | 2.00  | 2.22  | 0       | 40.00  | 0      | 66.67  | 0      | 0      |
| Propionic                                                        | 1.00  | 1.11  | 0       | 20.00  | 0.142  | 33.24  | 99.72  | 100    |
| Water                                                            | 95.00 | 94.44 | 99.9799 | 0.34   | 0.86   | 0      | 0      | 0      |
| Composition 2, 50 g/kg. Water removed by RO membranes (t/d): 200 |       |       |         |        |        |        |        |        |
| Reflux ratios for columns 1, 2, 3: 0.51, 16, 1.5, respectively.  |       |       |         |        |        |        |        |        |
| Variable                                                         | 1     | 2     | 3       | 4      | 5      | 6      | 7      | 8      |
| Temperature (°C)                                                 | 25    | 25    | 99.66   | 141.49 | 117.37 | 178.30 | 140.63 | 216.23 |
| Total flow rate (t/d)                                            | 1,000 | 800   | 750     | 50     | 20     | 30     | 10     | 20     |
| Composition (% w/w)                                              |       |       |         |        |        |        |        |        |
| Acetic                                                           | 2.00  | 2.50  | 0.023   | 39.66  | 99.00  | 0.095  | 0.285  | 0      |
| Lactic                                                           | 2.00  | 2.50  | 0       | 40.00  | 0      | 66.67  | 0      | 0      |
| Propionic                                                        | 1.00  | 1.25  | 0       | 20.00  | 0.142  | 33.24  | 99.72  | 100    |
| Water                                                            | 95.00 | 93.75 | 99.977  | 0.34   | 0.86   | 0      | 0      | 0      |
| Composition 2, 50 g/kg. Water removed by RO membranes (t/d): 300 |       |       |         |        |        |        |        |        |
| Reflux ratios for columns 1, 2, 3: 0.51, 16, 1.5, respectively.  |       |       |         |        |        |        |        |        |
| Variable                                                         | 1     | 2     | 3       | 4      | 5      | 6      | 7      | 8      |
| Temperature (°C)                                                 | 25    | 25    | 99.66   | 141.49 | 117.37 | 178.30 | 140.63 | 216.23 |
| Total flow rate (t/d)                                            | 1,000 | 700   | 650     | 50     | 20     | 30     | 10     | 20     |
| Composition (% w/w)                                              |       |       |         |        |        |        |        |        |
| Acetic                                                           | 2.00  | 2.86  | 0.0264  | 39.66  | 99.00  | 0.095  | 0.285  | 0      |
| Lactic                                                           | 2.00  | 2.86  | 0       | 40.00  | 0      | 66.67  | 0      | 0      |
| Propionic                                                        | 1.00  | 1.43  | 0       | 20.00  | 0.142  | 33.24  | 99.72  | 100    |
| Water                                                            | 95.00 | 92.86 | 99.9736 | 0.34   | 0.86   | 0      | 0      | 0      |
| Composition 2, 50 g/kg. Water removed by RO membranes (t/d): 400 |       |       |         |        |        |        |        |        |
| Reflux ratios for columns 1, 2, 3: 0.51, 16, 1.5, respectively.  |       |       |         |        |        |        |        |        |
| Variable                                                         | 1     | 2     | 3       | 4      | 5      | 6      | 7      | 8      |
| Temperature (°C)                                                 | 25    | 25    | 99.66   | 141.49 | 117.37 | 178.30 | 140.63 | 216.23 |
| Total flow rate (t/d)                                            | 1,000 | 600   | 550     | 50     | 20     | 30     | 10     | 20     |
| Composition (% w/w)                                              |       |       |         |        |        |        |        |        |
| Acetic                                                           | 2.00  | 3.33  | 0.0310  | 39.66  | 99.00  | 0.095  | 0.285  | 0      |
| Lactic                                                           | 2.00  | 3.33  | 0       | 40.00  | 0      | 66.67  | 0      | 0      |
| Propionic                                                        | 1.00  | 1.67  | 0       | 20.00  | 0.142  | 33.24  | 99.72  | 100    |
| Water                                                            | 95.00 | 91.67 | 99.9690 | 0.34   | 0.86   | 0      | 0      | 0      |

| Composition 2, 50 g/kg. Water removed by RO membranes (t/d): 500<br>Reflux ratios for columns 1, 2, 3: 0.50, 16, 1.5, respectively. |       |       |         |        |        |        |        |        |
|-------------------------------------------------------------------------------------------------------------------------------------|-------|-------|---------|--------|--------|--------|--------|--------|
| Variable                                                                                                                            | 1     | 2     | 3       | 4      | 5      | 6      | 7      | 8      |
| Temperature (°C)                                                                                                                    | 25    | 25    | 99.66   | 141.49 | 117.37 | 178.30 | 140.63 | 216.23 |
| Total flow rate (t/d)                                                                                                               | 1,000 | 500   | 450     | 50     | 20     | 30     | 10     | 20     |
| Composition (% w/w)                                                                                                                 |       |       |         |        |        |        |        |        |
| Acetic                                                                                                                              | 2.00  | 4.00  | 0.0383  | 39.66  | 99.00  | 0.095  | 0.285  | 0      |
| Lactic                                                                                                                              | 2.00  | 4.00  | 0       | 40.00  | 0      | 66.67  | 0      | 0      |
| Propionic                                                                                                                           | 1.00  | 2.00  | 0       | 20.00  | 0.142  | 33.24  | 99.72  | 100    |
| Water                                                                                                                               | 95.00 | 90.00 | 99.9617 | 0.34   | 0.86   | 0      | 0      | 0      |
| Composition 2, 50 g/kg. Water removed by RO membranes (t/d): 600<br>Reflux ratios for columns 1, 2, 3: 0.50, 16, 1.5, respectively. |       |       |         |        |        |        |        |        |
| Variable                                                                                                                            | 1     | 2     | 3       | 4      | 5      | 6      | 7      | 8      |
| Temperature (°C)                                                                                                                    | 25    | 25    | 99.66   | 141.49 | 117.37 | 178.30 | 140.63 | 216.23 |
| Total flow rate (t/d)                                                                                                               | 1,000 | 400   | 350     | 50     | 20     | 30     | 10     | 20     |
| Composition (% w/w)                                                                                                                 |       |       |         |        |        |        |        |        |
| Acetic                                                                                                                              | 2.00  | 5.00  | 0.0492  | 39.66  | 99.00  | 0.095  | 0.285  | 0      |
| Lactic                                                                                                                              | 2.00  | 5.00  | 0       | 40.00  | 0      | 66.67  | 0      | 0      |
| Propionic                                                                                                                           | 1.00  | 2.50  | 0       | 20.00  | 0.142  | 33.24  | 99.72  | 100    |
| Water                                                                                                                               | 95.00 | 87.5  | 99.9508 | 0.34   | 0.86   | 0      | 0      | 0      |
| Composition 2, 50 g/kg. Water removed by RO membranes (t/d): 700<br>Reflux ratios for columns 1, 2, 3: 0.51, 16, 1.5, respectively. |       |       |         |        |        |        |        |        |
| Variable                                                                                                                            | 1     | 2     | 3       | 4      | 5      | 6      | 7      | 8      |
| Temperature (°C)                                                                                                                    | 25    | 25    | 99.66   | 141.49 | 117.37 | 178.30 | 140.63 | 216.23 |
| Total flow rate (t/d)                                                                                                               | 1,000 | 300   | 250     | 50     | 20     | 30     | 10     | 20     |
| Composition (% w/w)                                                                                                                 |       |       |         |        |        |        |        |        |
| Acetic                                                                                                                              | 2.00  | 6.67  | 0.0687  | 39.66  | 99.00  | 0.095  | 0.285  | 0      |
| Lactic                                                                                                                              | 2.00  | 6.67  | 0       | 40.00  | 0      | 66.67  | 0      | 0      |
| Propionic                                                                                                                           | 1.00  | 3.33  | 0       | 20.00  | 0.142  | 33.24  | 99.72  | 100    |
| Water                                                                                                                               | 95.00 | 83.33 | 99.9313 | 0.34   | 0.86   | 0      | 0      | 0      |
| Composition 2, 50 g/kg. Water removed by RO membranes (t/d): 800<br>Reflux ratios for columns 1, 2, 3: 0.54, 16, 1.5, respectively. |       |       |         |        |        |        |        |        |
| Variable                                                                                                                            | 1     | 2     | 3       | 4      | 5      | 6      | 7      | 8      |
| Temperature (°C)                                                                                                                    | 25    | 25    | 99.66   | 141.49 | 117.37 | 178.30 | 140.63 | 216.23 |
| Total flow rate (t/d)                                                                                                               | 1,000 | 200   | 150     | 50     | 20     | 30     | 10     | 20     |
| Composition (% w/w)                                                                                                                 |       |       |         |        |        |        |        |        |
| Acetic                                                                                                                              | 2.00  | 10.00 | 0.1145  | 39.66  | 99.00  | 0.095  | 0.285  | 0      |
| Lactic                                                                                                                              | 2.00  | 10.00 | 0       | 40.00  | 0      | 66.67  | 0      | 0      |
| Propionic                                                                                                                           | 1.00  | 5.00  | 0       | 20.00  | 0.142  | 33.24  | 99.72  | 100    |
| Water                                                                                                                               | 95.00 | 75.00 | 99.8855 | 0.34   | 0.86   | 0      | 0      | 0      |
| Composition 2, 50 g/kg. Water removed by RO membranes (t/d): 900<br>Reflux ratios for columns 1, 2, 3: 0.77, 16, 1.5, respectively. |       |       |         |        |        |        |        |        |
| Variable                                                                                                                            | 1     | 2     | 3       | 4      | 5      | 6      | 7      | 8      |
| Temperature (°C)                                                                                                                    | 25    | 25    | 99.68   | 141.50 | 117.37 | 178.30 | 140.63 | 216.23 |
| Total flow rate (t/d)                                                                                                               | 1,000 | 100   | 50      | 50     | 20     | 30     | 10     | 20     |
| Composition (% w/w)                                                                                                                 |       |       |         |        |        |        |        |        |
| Acetic                                                                                                                              | 2.00  | 20.00 | 0.3435  | 39.66  | 99.00  | 0.095  | 0.285  | 0      |
| Lactic                                                                                                                              | 2.00  | 20.00 | 0       | 40.00  | 0      | 66.67  | 0.041  | 0      |
| Propionic                                                                                                                           | 1.00  | 10.00 | 0       | 20.00  | 0.142  | 33.24  | 99.67  | 100    |
| Water                                                                                                                               | 95.00 | 50.00 | 99.6564 | 0.34   | 0.86   | 0      | 0      | 0      |

| Composition 2, 100 g/kg. Water removed by RO membranes (t/d): 0   |       |       |         |        |        |        |        |        |
|-------------------------------------------------------------------|-------|-------|---------|--------|--------|--------|--------|--------|
| Reflux ratios for columns 1, 2, 3: 0.50, 16, 1.5, respectively.   |       |       |         |        |        |        |        |        |
| Variable                                                          | 1     | 2     | 3       | 4      | 5      | 6      | 7      | 8      |
| Temperature (°C)                                                  | 25    | 25    | 99.68   | 141.50 | 117.37 | 178.30 | 140.63 | 216.23 |
| Total flow rate (t/d)                                             | 1,000 | 1,000 | 900     | 100    | 40     | 60     | 20     | 40     |
| Composition (% w/w)                                               |       |       |         |        |        |        |        |        |
| Acetic                                                            | 4.00  | 4.00  | 0.0383  | 39.66  | 99.00  | 0.095  | 0.285  | 0      |
| Lactic                                                            | 4.00  | 4.00  | 0       | 40.00  | 0      | 66.67  | 0.041  | 0      |
| Propionic                                                         | 2.00  | 2.00  | 0       | 20.00  | 0.142  | 33.24  | 99.67  | 100    |
| Water                                                             | 90.00 | 90.00 | 99.9617 | 0.34   | 0.86   | 0      | 0      | 0      |
| Composition 2, 100 g/kg. Water removed by RO membranes (t/d): 100 |       |       |         |        |        |        |        |        |
| Reflux ratios for columns 1, 2, 3: 0.50, 16, 1.5, respectively.   |       |       |         |        |        |        |        |        |
| Variable                                                          | 1     | 2     | 3       | 4      | 5      | 6      | 7      | 8      |
| Temperature (°C)                                                  | 25    | 25    | 99.68   | 141.50 | 117.37 | 178.30 | 140.63 | 216.23 |
| Total flow rate (t/d)                                             | 1,000 | 900   | 800     | 100    | 40     | 60     | 20     | 40     |
| Composition (% w/w)                                               |       |       |         |        |        |        |        |        |
| Acetic                                                            | 4.00  | 4.44  | 0.0431  | 39.66  | 99.00  | 0.095  | 0.285  | 0      |
| Lactic                                                            | 4.00  | 4.44  | 0       | 40.00  | 0      | 66.67  | 0.041  | 0      |
| Propionic                                                         | 2.00  | 2.22  | 0       | 20.00  | 0.142  | 33.24  | 99.67  | 100    |
| Water                                                             | 90.00 | 88.89 | 99.9569 | 0.34   | 0.86   | 0      | 0      | 0      |
| Composition 2, 100 g/kg. Water removed by RO membranes (t/d): 200 |       |       |         |        |        |        |        |        |
| Reflux ratios for columns 1, 2, 3: 0.50, 16, 1.5                  |       |       |         |        |        |        |        |        |
| Variable                                                          | 1     | 2     | 3       | 4      | 5      | 6      | 7      | 8      |
| Temperature (°C)                                                  | 25    | 25    | 99.68   | 141.50 | 117.37 | 178.30 | 140.63 | 216.23 |
| Total flow rate (t/d)                                             | 1,000 | 800   | 700     | 100    | 40     | 60     | 20     | 40     |
| Composition (% w/w)                                               |       |       |         |        |        |        |        |        |
| Acetic                                                            | 4.00  | 5.00  | 0.0492  | 39.66  | 99.00  | 0.095  | 0.285  | 0      |
| Lactic                                                            | 4.00  | 5.00  | 0       | 40.00  | 0      | 66.67  | 0.041  | 0      |
| Propionic                                                         | 2.00  | 2.50  | 0       | 20.00  | 0.142  | 33.24  | 99.67  | 100    |
| Water                                                             | 90.00 | 87.50 | 99.9508 | 0.34   | 0.86   | 0      | 0      | 0      |
| Composition 2, 100 g/kg. Water removed by RO membranes (t/d): 300 |       |       |         |        |        |        |        |        |
| Reflux ratios for columns 1, 2, 3: 0.59, 10, 1.5, respectively.   |       |       |         |        |        |        |        |        |
| Variable                                                          | 1     | 2     | 3       | 4      | 5      | 6      | 7      | 8      |
| Temperature (°C)                                                  | 25    | 25    | 99.68   | 141.50 | 117.37 | 178.30 | 140.63 | 216.23 |
| Total flow rate (t/d)                                             | 1,000 | 700   | 600     | 100    | 40     | 60     | 20     | 40     |
| Composition (% w/w)                                               |       |       |         |        |        |        |        |        |
| Acetic                                                            | 4.00  | 5.72  | 0.0526  | 39.66  | 99.00  | 0.095  | 0.285  | 0      |
| Lactic                                                            | 4.00  | 5.72  | 0       | 40.00  | 0      | 66.67  | 0.041  | 0      |
| Propionic                                                         | 2.00  | 2.86  | 0       | 20.00  | 0.142  | 33.24  | 99.67  | 100    |
| Water                                                             | 90.00 | 85.71 | 99.9474 | 0.34   | 0.86   | 0      | 0      | 0      |
| Composition 2, 100 g/kg. Water removed by RO membranes (t/d): 400 |       |       |         |        |        |        |        |        |
| Reflux ratios for columns 1, 2, 3: 0.59, 10, 1.5, respectively.   |       |       |         |        |        |        |        |        |
| Variable                                                          | 1     | 2     | 3       | 4      | 5      | 6      | 7      | 8      |
| Temperature (°C)                                                  | 25    | 25    | 99.68   | 141.50 | 117.37 | 178.30 | 140.63 | 216.23 |
| Total flow rate (t/d)                                             | 1,000 | 600   | 500     | 100    | 40     | 60     | 20     | 40     |
| Composition (% w/w)                                               |       |       |         |        |        |        |        |        |
| Acetic                                                            | 4.00  | 6.67  | 0.0635  | 39.66  | 99.00  | 0.095  | 0.285  | 0      |
| Lactic                                                            | 4.00  | 6.67  | 0       | 40.00  | 0      | 66.67  | 0.041  | 0      |
| Propionic                                                         | 2.00  | 3.33  | 0       | 20.00  | 0.142  | 33.24  | 99.67  | 100    |
| Water                                                             | 90.00 | 83.33 | 99.9365 | 0.34   | 0.86   | 0      | 0      | 0      |

| Composition 2, 100 g/kg. Water removed by RO membranes (t/d): 500<br>Reflux ratios for columns 1, 2, 3: 0.61, 10, 1.5, respectively. |       |       |         |        |        |        |        |        |
|--------------------------------------------------------------------------------------------------------------------------------------|-------|-------|---------|--------|--------|--------|--------|--------|
| Variable                                                                                                                             | 1     | 2     | 3       | 4      | 5      | 6      | 7      | 8      |
| Temperature (°C)                                                                                                                     | 25    | 25    | 99.68   | 141.50 | 117.37 | 178.30 | 140.63 | 216.23 |
| Total flow rate (t/d)                                                                                                                | 1,000 | 500   | 400     | 100    | 40     | 60     | 20     | 40     |
| Composition (% w/w)                                                                                                                  |       |       |         |        |        |        |        |        |
| Acetic                                                                                                                               | 4.00  | 8.00  | 0.0788  | 39.66  | 99.00  | 0.095  | 0.285  | 0      |
| Lactic                                                                                                                               | 4.00  | 8.00  | 0       | 40.00  | 0      | 66.67  | 0.041  | 0      |
| Propionic                                                                                                                            | 2.00  | 4.00  | 0       | 20.00  | 0.142  | 33.24  | 99.67  | 100    |
| Water                                                                                                                                | 90.00 | 80.00 | 99.9211 | 0.34   | 0.86   | 0      | 0      | 0      |
| Composition 2, 100 g/kg. Water removed by RO membranes (t/d): 600<br>Reflux ratios for columns 1, 2, 3: 0.68, 9, 1.5, respectively.  |       |       |         |        |        |        |        |        |
| Variable                                                                                                                             | 1     | 2     | 3       | 4      | 5      | 6      | 7      | 8      |
| Temperature (°C)                                                                                                                     | 25    | 25    | 99.68   | 141.50 | 117.37 | 178.30 | 140.63 | 216.23 |
| Total flow rate (t/d)                                                                                                                | 1,000 | 400   | 300     | 100    | 40     | 60     | 20     | 40     |
| Composition (% w/w)                                                                                                                  |       |       |         |        |        |        |        |        |
| Acetic                                                                                                                               | 4.00  | 10.00 | 0.102   | 39.66  | 99.00  | 0.095  | 0.285  | 0      |
| Lactic                                                                                                                               | 4.00  | 10.00 | 0       | 40.00  | 0      | 66.67  | 0.041  | 0      |
| Propionic                                                                                                                            | 2.00  | 5.00  | 0       | 20.00  | 0.142  | 33.24  | 99.67  | 100    |
| Water                                                                                                                                | 90.00 | 75.00 | 99.9881 | 0.34   | 0.86   | 0      | 0      | 0      |
| Composition 2, 100 g/kg. Water removed by RO membranes (t/d): 700<br>Reflux ratios for columns 1, 2, 3: 0.74, 9, 1.5, respectively.  |       |       |         |        |        |        |        |        |
| Variable                                                                                                                             | 1     | 2     | 3       | 4      | 5      | 6      | 7      | 8      |
| Temperature (°C)                                                                                                                     | 25    | 25    | 99.68   | 141.50 | 117.37 | 178.30 | 140.63 | 216.23 |
| Total flow rate (t/d)                                                                                                                | 1,000 | 300   | 200     | 100    | 40     | 60     | 20     | 40     |
| Composition (% w/w)                                                                                                                  |       |       |         |        |        |        |        |        |
| Acetic                                                                                                                               | 4.00  | 13.33 | 0.153   | 39.66  | 99.00  | 0.095  | 0.285  | 0      |
| Lactic                                                                                                                               | 4.00  | 13.33 | 0       | 40.00  | 0      | 66.67  | 0.041  | 0      |
| Propionic                                                                                                                            | 2.00  | 6.67  | 0       | 20.00  | 0.142  | 33.24  | 99.67  | 100    |
| Water                                                                                                                                | 90.00 | 66.67 | 99.8469 | 0.34   | 0.86   | 0      | 0      | 0      |
| Composition 2, 100 g/kg. Water removed by RO membranes (t/d): 800<br>Reflux ratios for columns 1, 2, 3: 0.94, 9, 1.5, respectively.  |       |       |         |        |        |        |        |        |
| Variable                                                                                                                             | 1     | 2     | 3       | 4      | 5      | 6      | 7      | 8      |
| Temperature (°C)                                                                                                                     | 25    | 25    | 99.68   | 141.50 | 117.37 | 178.30 | 140.63 | 216.23 |
| Total flow rate (t/d)                                                                                                                | 1,000 | 200   | 100     | 100    | 40     | 60     | 20     | 40     |
| Composition (% w/w)                                                                                                                  |       |       |         |        |        |        |        |        |
| Acetic                                                                                                                               | 4.00  | 20.00 | 0.307   | 39.66  | 99.00  | 0.095  | 0.285  | 0      |
| Lactic                                                                                                                               | 4.00  | 20.00 | 0       | 40.00  | 0      | 66.67  | 0.041  | 0      |
| Propionic                                                                                                                            | 2.00  | 10.00 | 0       | 20.00  | 0.142  | 33.24  | 99.67  | 100    |
| Water                                                                                                                                | 90.00 | 50.00 | 99.6929 | 0.34   | 0.86   | 0      | 0      | 0      |
| Composition 2, 100 g/kg. Water removed by RO membranes (t/d): 900<br>Reflux ratios for columns 2, 3: 5, 1.5, respectively.           |       |       |         |        |        |        |        |        |
| Variable                                                                                                                             | 1     | 2     | 3       | 4      | 5      | 6      | 7      | 8      |
| Temperature (°C)                                                                                                                     | 25    | 25    | -       | -      | 117.66 | 178.13 | 140.42 | 216.23 |
| Total flow rate (t/d)                                                                                                                | 1,000 | 100   | -       | -      | 40     | 60     | 20     | 40     |
| Composition (% w/w)                                                                                                                  |       |       |         |        |        |        |        |        |
| Acetic                                                                                                                               | 4.00  | 40.00 | -       | -      | 99.51  | 0.32   | 0.972  | 0      |
| Lactic                                                                                                                               | 4.00  | 40.00 | -       | -      | 0      | 66.67  | 0.026  | 0      |
| Propionic                                                                                                                            | 2.00  | 20.00 | -       | -      | 0.486  | 33.00  | 99.00  | 100    |
| Water                                                                                                                                | 90.00 | 0     | -       | -      | 0      | 0      | 0      | 0      |

| Composition 3, 10 g/kg. Water removed by RO membranes (t/d): 0<br>Reflux ratios for columns 1, 2: 0.99, 14, respectively.   |       |       |         |        |        |        |   |   |
|-----------------------------------------------------------------------------------------------------------------------------|-------|-------|---------|--------|--------|--------|---|---|
| Variable                                                                                                                    | 1     | 2     | 3       | 4      | 5      | 6      | 7 | 8 |
| Temperature (°C)                                                                                                            | 25    | 25    | 99.66   | 124.65 | 117.39 | 140.64 | - | - |
| Total flow rate (t/d)                                                                                                       | 1,000 | 1,000 | 990     | 10     | 6      | 4      | - | - |
| Composition (% w/w)                                                                                                         |       |       |         |        |        |        |   |   |
| Acetic                                                                                                                      | 0.60  | 0.60  | 0.0050  | 59.51  | 99.00  | 0.27   | - | - |
| Lactic                                                                                                                      | 0     | 0     | 0       | 0      | 0      | 0      | - | - |
| Propionic                                                                                                                   | 0.40  | 0.40  | 0       | 40.00  | 0.183  | 99.73  | - | - |
| Water                                                                                                                       | 99.00 | 99.00 | 99.995  | 0.491  | 0.819  | 0      | - | - |
| Composition 3, 10 g/kg. Water removed by RO membranes (t/d): 100<br>Reflux ratios for columns 1, 2: 0.98, 14, respectively. |       |       |         |        |        |        |   |   |
| Variable                                                                                                                    | 1     | 2     | 3       | 4      | 5      | 6      | 7 | 8 |
| Temperature (°C)                                                                                                            | 25    | 25    | 99.66   | 124.65 | 117.39 | 140.64 | - | - |
| Total flow rate (t/d)                                                                                                       | 1,000 | 900   | 890     | 10     | 6      | 4      | - | - |
| Composition (% w/w)                                                                                                         |       |       |         |        |        |        |   |   |
| Acetic                                                                                                                      | 0.60  | 0.67  | 0.0055  | 59.51  | 99.00  | 0.27   | - | - |
| Lactic                                                                                                                      | 0     | 0     | 0       | 0      | 0      | 0      | - | - |
| Propionic                                                                                                                   | 0.40  | 0.44  | 0       | 40.00  | 0.183  | 99.73  | - | - |
| Water                                                                                                                       | 99.00 | 98.89 | 99.9945 | 0.491  | 0.819  | 0      | - | - |
| Composition 3, 10 g/kg. Water removed by RO membranes (t/d): 200<br>Reflux ratios for columns 1, 2: 0.97, 14, respectively. |       |       |         |        |        |        |   |   |
| Variable                                                                                                                    | 1     | 2     | 3       | 4      | 5      | 6      | 7 | 8 |
| Temperature (°C)                                                                                                            | 25    | 25    | 99.66   | 124.65 | 117.39 | 140.64 | - | - |
| Total flow rate (t/d)                                                                                                       | 1,000 | 800   | 790     | 10     | 6      | 4      | - | - |
| Composition (% w/w)                                                                                                         |       |       |         |        |        |        |   |   |
| Acetic                                                                                                                      | 0.60  | 0.75  | 0.0062  | 59.51  | 99.00  | 0.27   | - | - |
| Lactic                                                                                                                      | 0     | 0     | 0       | 0      | 0      | 0      | - | - |
| Propionic                                                                                                                   | 0.40  | 0.50  | 0       | 40.00  | 0.183  | 99.73  | - | - |
| Water                                                                                                                       | 99.00 | 98.75 | 99.9938 | 0.491  | 0.819  | 0      | - | - |
| Composition 3, 10 g/kg. Water removed by RO membranes (t/d): 300<br>Reflux ratios for columns 1, 2: 0.96, 14, respectively. |       |       |         |        |        |        |   |   |
| Variable                                                                                                                    | 1     | 2     | 3       | 4      | 5      | 6      | 7 | 8 |
| Temperature (°C)                                                                                                            | 25    | 25    | 99.66   | 124.65 | 117.39 | 140.64 | - | - |
| Total flow rate (t/d)                                                                                                       | 1,000 | 700   | 690     | 10     | 6      | 4      | - | - |
| Composition (% w/w)                                                                                                         |       |       |         |        |        |        |   |   |
| Acetic                                                                                                                      | 0.60  | 0.857 | 0.0071  | 59.51  | 99.00  | 0.27   | - | - |
| Lactic                                                                                                                      | 0     | 0     | 0       | 0      | 0      | 0      | - | - |
| Propionic                                                                                                                   | 0.40  | 0.571 | 0       | 40.00  | 0.183  | 99.73  | - | - |
| Water                                                                                                                       | 99.00 | 98.57 | 99.9929 | 0.491  | 0.819  | 0      | - | - |
| Composition 3, 10 g/kg. Water removed by RO membranes (t/d): 400<br>Reflux ratios for columns 1, 2: 0.95, 14, respectively. |       |       |         |        |        |        |   |   |
| Variable                                                                                                                    | 1     | 2     | 3       | 4      | 5      | 6      | 7 | 8 |
| Temperature (°C)                                                                                                            | 25    | 25    | 99.66   | 124.65 | 117.39 | 140.64 | - | - |
| Total flow rate (t/d)                                                                                                       | 1,000 | 600   | 590     | 10     | 6      | 4      | - | - |
| Composition (% w/w)                                                                                                         |       |       |         |        |        |        |   |   |
| Acetic                                                                                                                      | 0.60  | 1.00  | 0.0083  | 59.51  | 99.00  | 0.27   | - | - |
| Lactic                                                                                                                      | 0     | 0     | 0       | 0      | 0      | 0      | - | - |
| Propionic                                                                                                                   | 0.40  | 0.67  | 0       | 40.00  | 0.183  | 99.73  | - | - |
| Water                                                                                                                       | 99.00 | 98.33 | 99.9917 | 0.491  | 0.819  | 0      | - | - |

| Composition 3, 10 g/kg. Water removed by RO membranes (t/d): 500<br>Reflux ratios for columns 1, 2: 0.94, 14, respectively. |       |       |         |        |        |        |   |   |
|-----------------------------------------------------------------------------------------------------------------------------|-------|-------|---------|--------|--------|--------|---|---|
| Variable                                                                                                                    | 1     | 2     | 3       | 4      | 5      | 6      | 7 | 8 |
| Temperature (°C)                                                                                                            | 25    | 25    | 99.66   | 124.65 | 117.39 | 140.64 | - | - |
| Total flow rate (t/d)                                                                                                       | 1,000 | 500   | 490     | 10     | 6      | 4      | - | - |
| Composition (% w/w)                                                                                                         |       |       |         |        |        |        |   |   |
| Acetic                                                                                                                      | 0.60  | 1.20  | 0.0100  | 59.51  | 99.00  | 0.27   | - | - |
| Lactic                                                                                                                      | 0     | 0     | 0       | 0      | 0      | 0      | - | - |
| Propionic                                                                                                                   | 0.40  | 0.80  | 0       | 40.00  | 0.183  | 99.73  | - | - |
| Water                                                                                                                       | 99.00 | 98.00 | 99.990  | 0.491  | 0.819  | 0      | - | - |
| Composition 3, 10 g/kg. Water removed by RO membranes (t/d): 600<br>Reflux ratios for columns 1, 2: 0.93, 14, respectively. |       |       |         |        |        |        |   |   |
| Variable                                                                                                                    | 1     | 2     | 3       | 4      | 5      | 6      | 7 | 8 |
| Temperature (°C)                                                                                                            | 25    | 25    | 99.66   | 124.65 | 117.39 | 140.64 | - | - |
| Total flow rate (t/d)                                                                                                       | 1,000 | 400   | 390     | 10     | 6      | 4      | - | - |
| Composition (% w/w)                                                                                                         |       |       |         |        |        |        |   |   |
| Acetic                                                                                                                      | 0.60  | 1.50  | 0.0126  | 59.51  | 99.00  | 0.27   | - | - |
| Lactic                                                                                                                      | 0     | 0     | 0       | 0      | 0      | 0      | - | - |
| Propionic                                                                                                                   | 0.40  | 1     | 0       | 40.00  | 0.183  | 99.73  | - | - |
| Water                                                                                                                       | 99.00 | 97.50 | 99.9874 | 0.491  | 0.819  | 0      | - | - |
| Composition 3, 10 g/kg. Water removed by RO membranes (t/d): 700<br>Reflux ratios for columns 1, 2: 0.92, 14, respectively. |       |       |         |        |        |        |   |   |
| Variable                                                                                                                    | 1     | 2     | 3       | 4      | 5      | 6      | 7 | 8 |
| Temperature (°C)                                                                                                            | 25    | 25    | 99.66   | 124.65 | 117.39 | 140.64 | - | - |
| Total flow rate (t/d)                                                                                                       | 1,000 | 300   | 290     | 10     | 6      | 4      | - | - |
| Composition (% w/w)                                                                                                         |       |       |         |        |        |        |   |   |
| Acetic                                                                                                                      | 0.60  | 2.00  | 0.0170  | 59.51  | 99.00  | 0.27   | - | - |
| Lactic                                                                                                                      | 0     | 0     | 0       | 0      | 0      | 0      | - | - |
| Propionic                                                                                                                   | 0.40  | 1.33  | 0       | 40.00  | 0.183  | 99.73  | - | - |
| Water                                                                                                                       | 99.00 | 96.67 | 99.9830 | 0.491  | 0.819  | 0      | - | - |
| Composition 3, 10 g/kg. Water removed by RO membranes (t/d): 800<br>Reflux ratios for columns 1, 2: 0.92, 14, respectively. |       |       |         |        |        |        |   |   |
| Variable                                                                                                                    | 1     | 2     | 3       | 4      | 5      | 6      | 7 | 8 |
| Temperature (°C)                                                                                                            | 25    | 25    | 99.66   | 124.65 | 117.39 | 140.64 | - | - |
| Total flow rate (t/d)                                                                                                       | 1,000 | 200   | 190     | 10     | 6      | 4      | - | - |
| Composition (% w/w)                                                                                                         |       |       |         |        |        |        |   |   |
| Acetic                                                                                                                      | 0.60  | 3.00  | 0.0259  | 59.51  | 99.00  | 0.27   | - | - |
| Lactic                                                                                                                      | 0     | 0     | 0       | 0      | 0      | 0      | - | - |
| Propionic                                                                                                                   | 0.40  | 2.00  | 0       | 40.00  | 0.183  | 99.73  | - | - |
| Water                                                                                                                       | 99.00 | 95.00 | 99.9741 | 0.493  | 0.822  | 0      | - | - |
| Composition 3, 10 g/kg. Water removed by RO membranes (t/d): 900<br>Reflux ratios for columns 1, 2: 0.97, 14, respectively. |       |       |         |        |        |        |   |   |
| Variable                                                                                                                    | 1     | 2     | 3       | 4      | 5      | 6      | 7 | 8 |
| Temperature (°C)                                                                                                            | 25    | 25    | 99.66   | 124.65 | 117.39 | 140.64 | - | - |
| Total flow rate (t/d)                                                                                                       | 1,000 | 100   | 90      | 10     | 6      | 4      | - | - |
| Composition (% w/w)                                                                                                         |       |       |         |        |        |        |   |   |
| Acetic                                                                                                                      | 0.60  | 6.00  | 0.0547  | 59.51  | 99.00  | 0.27   | - | - |
| Lactic                                                                                                                      | 0     | 0     | 0       | 0      | 0      | 0      | - | - |
| Propionic                                                                                                                   | 0.40  | 4.00  | 0       | 40.00  | 0.183  | 99.73  | - | - |
| Water                                                                                                                       | 99.00 | 90.00 | 99.9453 | 0.491  | 0.821  | 0      | - | - |

| Composition 3, 50 g/kg. Water removed by RO membranes (t/d): 0<br>Reflux ratios for columns 1, 2: 0.96, 13, respectively.   |       |       |         |        |        |        |   |   |
|-----------------------------------------------------------------------------------------------------------------------------|-------|-------|---------|--------|--------|--------|---|---|
| Variable                                                                                                                    | 1     | 2     | 3       | 4      | 5      | 6      | 7 | 8 |
| Temperature (°C)                                                                                                            | 25    | 25    | 99.66   | 124.66 | 117.39 | 140.63 | - | - |
| Total flow rate (t/d)                                                                                                       | 1,000 | 1,000 | 950     | 50     | 30     | 20     | - | - |
| Composition (% w/w)                                                                                                         |       |       |         |        |        |        |   |   |
| Acetic                                                                                                                      | 3.00  | 3.00  | 0.02556 | 59.51  | 99.00  | 0.29   | - | - |
| Lactic                                                                                                                      | 0     | 0     | 0       | 0      | 0      | 0      | - | - |
| Propionic                                                                                                                   | 2.00  | 2.00  | 0       | 40.00  | 0.194  | 99.71  | - | - |
| Water                                                                                                                       | 95.00 | 95.00 | 99.9744 | 0.486  | 0.81   | 0      | - | - |
| Composition 3, 50 g/kg. Water removed by RO membranes (t/d): 100<br>Reflux ratios for columns 1, 2: 0.96, 13, respectively. |       |       |         |        |        |        |   |   |
| Variable                                                                                                                    | 1     | 2     | 3       | 4      | 5      | 6      | 7 | 8 |
| Temperature (°C)                                                                                                            | 25    | 25    | 99.66   | 124.66 | 117.39 | 140.63 | - | - |
| Total flow rate (t/d)                                                                                                       | 1,000 | 900   | 850     | 50     | 30     | 20     | - | - |
| Composition (% w/w)                                                                                                         |       |       |         |        |        |        |   |   |
| Acetic                                                                                                                      | 3.00  | 3.33  | 0.0286  | 59.51  | 99.00  | 0.29   | - | - |
| Lactic                                                                                                                      | 0     | 0     | 0       | 0      | 0      | 0      | - | - |
| Propionic                                                                                                                   | 2.00  | 2.22  | 0       | 40.00  | 0.194  | 99.71  | - | - |
| Water                                                                                                                       | 95.00 | 94.44 | 99.9714 | 0.486  | 0.81   | 0      | - | - |
| Composition 3, 50 g/kg. Water removed by RO membranes (t/d): 200<br>Reflux ratios for columns 1, 2: 0.97, 13, respectively. |       |       |         |        |        |        |   |   |
| Variable                                                                                                                    | 1     | 2     | 3       | 4      | 5      | 6      | 7 | 8 |
| Temperature (°C)                                                                                                            | 25    | 25    | 99.66   | 124.66 | 117.39 | 140.63 | - | - |
| Total flow rate (t/d)                                                                                                       | 1,000 | 800   | 750     | 50     | 30     | 20     | - | - |
| Composition (% w/w)                                                                                                         |       |       |         |        |        |        |   |   |
| Acetic                                                                                                                      | 3.00  | 3.75  | 0.0324  | 59.51  | 99.00  | 0.29   | - | - |
| Lactic                                                                                                                      | 0     | 0     | 0       | 0      | 0      | 0      | - | - |
| Propionic                                                                                                                   | 2.00  | 2.50  | 0       | 40.00  | 0.194  | 99.71  | - | - |
| Water                                                                                                                       | 95.00 | 93.75 | 99.9676 | 0.486  | 0.81   | 0      | - | - |
| Composition 3, 50 g/kg. Water removed by RO membranes (t/d): 300<br>Reflux ratios for columns 1, 2: 0.98, 13, respectively. |       |       |         |        |        |        |   |   |
| Variable                                                                                                                    | 1     | 2     | 3       | 4      | 5      | 6      | 7 | 8 |
| Temperature (°C)                                                                                                            | 25    | 25    | 99.66   | 124.66 | 117.39 | 140.63 | - | - |
| Total flow rate (t/d)                                                                                                       | 1,000 | 700   | 650     | 50     | 30     | 20     | - | - |
| Composition (% w/w)                                                                                                         |       |       |         |        |        |        |   |   |
| Acetic                                                                                                                      | 3.00  | 4.29  | 0.0373  | 59.51  | 99.00  | 0.29   | - | - |
| Lactic                                                                                                                      | 0     | 0     | 0       | 0      | 0      | 0      | - | - |
| Propionic                                                                                                                   | 2.00  | 2.86  | 0       | 40.00  | 0.194  | 99.71  | - | - |
| Water                                                                                                                       | 95.00 | 92.86 | 99.9627 | 0.486  | 0.81   | 0      | - | - |
| Composition 3, 50 g/kg. Water removed by RO membranes (t/d): 400<br>Reflux ratios for columns 1, 2: 0.99, 13, respectively. |       |       |         |        |        |        |   |   |
| Variable                                                                                                                    | 1     | 2     | 3       | 4      | 5      | 6      | 7 | 8 |
| Temperature (°C)                                                                                                            | 25    | 25    | 99.66   | 124.66 | 117.39 | 140.63 | - | - |
| Total flow rate (t/d)                                                                                                       | 1,000 | 600   | 550     | 50     | 30     | 20     | - | - |
| Composition (% w/w)                                                                                                         |       |       |         |        |        |        |   |   |
| Acetic                                                                                                                      | 3.00  | 5.00  | 0.0441  | 59.51  | 99.00  | 0.29   | - | - |
| Lactic                                                                                                                      | 0     | 0     | 0       | 0      | 0      | 0      | - | - |
| Propionic                                                                                                                   | 2.00  | 3.33  | 0       | 40.00  | 0.194  | 99.71  | - | - |
| Water                                                                                                                       | 95.00 | 91.66 | 99.9559 | 0.486  | 0.81   | 0      | - | - |



| Composition 3, 50 g/kg. Water removed by RO membranes (t/d): 500<br>Reflux ratios for columns 1, 2: 1.06, 12, respectively. |       |       |         |        |        |        |   |   |
|-----------------------------------------------------------------------------------------------------------------------------|-------|-------|---------|--------|--------|--------|---|---|
| Variable                                                                                                                    | 1     | 2     | 3       | 4      | 5      | 6      | 7 | 8 |
| Temperature (°C)                                                                                                            | 25    | 25    | 99.66   | 124.66 | 117.39 | 140.63 | - | - |
| Total flow rate (t/d)                                                                                                       | 1,000 | 500   | 450     | 50     | 30     | 20     | - | - |
| Composition (% w/w)                                                                                                         |       |       |         |        |        |        |   |   |
| Acetic                                                                                                                      | 3.00  | 6.00  | 0.0531  | 59.51  | 99.00  | 0.29   | - | - |
| Lactic                                                                                                                      | 0     | 0     | 0       | 0      | 0      | 0      | - | - |
| Propionic                                                                                                                   | 2.00  | 4.00  | 0       | 40.00  | 0.194  | 99.71  | - | - |
| Water                                                                                                                       | 95.00 | 90.00 | 99.9469 | 0.486  | 0.81   | 0      | - | - |
| Composition 3, 50 g/kg. Water removed by RO membranes (t/d): 600<br>Reflux ratios for columns 1, 2: 1.10, 12, respectively. |       |       |         |        |        |        |   |   |
| Variable                                                                                                                    | 1     | 2     | 3       | 4      | 5      | 6      | 7 | 8 |
| Temperature (°C)                                                                                                            | 25    | 25    | 99.66   | 124.66 | 117.39 | 140.63 | - | - |
| Total flow rate (t/d)                                                                                                       | 1,000 | 400   | 350     | 50     | 30     | 20     | - | - |
| Composition (% w/w)                                                                                                         |       |       |         |        |        |        |   |   |
| Acetic                                                                                                                      | 3.00  | 7.50  | 0.0681  | 59.51  | 99.00  | 0.29   | - | - |
| Lactic                                                                                                                      | 0     | 0     | 0       | 0      | 0      | 0      | - | - |
| Propionic                                                                                                                   | 2.00  | 5.00  | 0       | 40.00  | 0.194  | 99.71  | - | - |
| Water                                                                                                                       | 95.00 | 87.5  | 99.9319 | 0.486  | 0.81   | 0      | - | - |
| Composition 3, 50 g/kg. Water removed by RO membranes (t/d): 700<br>Reflux ratios for columns 1, 2: 1.17, 12, respectively. |       |       |         |        |        |        |   |   |
| Variable                                                                                                                    | 1     | 2     | 3       | 4      | 5      | 6      | 7 | 8 |
| Temperature (°C)                                                                                                            | 25    | 25    | 99.67   | 124.66 | 117.40 | 140.63 | - | - |
| Total flow rate (t/d)                                                                                                       | 1,000 | 300   | 250     | 50     | 30     | 20     | - | - |
| Composition (% w/w)                                                                                                         |       |       |         |        |        |        |   |   |
| Acetic                                                                                                                      | 3.00  | 10.00 | 0.0953  | 59.51  | 99.00  | 0.29   | - | - |
| Lactic                                                                                                                      | 0     | 0     | 0       | 0      | 0      | 0      | - | - |
| Propionic                                                                                                                   | 2.00  | 6.67  | 0       | 40.00  | 0.194  | 99.71  | - | - |
| Water                                                                                                                       | 95.00 | 83.33 | 99.9047 | 0.486  | 0.81   | 0      | - | - |
| Composition 3, 50 g/kg. Water removed by RO membranes (t/d): 800<br>Reflux ratios for columns 1, 2: 1.33, 12, respectively. |       |       |         |        |        |        |   |   |
| Variable                                                                                                                    | 1     | 2     | 3       | 4      | 5      | 6      | 7 | 8 |
| Temperature (°C)                                                                                                            | 25    | 25    | 99.67   | 124.66 | 117.40 | 140.63 | - | - |
| Total flow rate (t/d)                                                                                                       | 1,000 | 200   | 150     | 50     | 30     | 20     | - | - |
| Composition (% w/w)                                                                                                         |       |       |         |        |        |        |   |   |
| Acetic                                                                                                                      | 3.00  | 15.00 | 0.159   | 59.51  | 99.00  | 0.29   | - | - |
| Lactic                                                                                                                      | 0     | 0     | 0       | 0      | 0      | 0      | - | - |
| Propionic                                                                                                                   | 2.00  | 10.00 | 0       | 40.00  | 0.194  | 99.71  | - | - |
| Water                                                                                                                       | 95.00 | 75.00 | 99.8408 | 0.486  | 0.81   | 0      | - | - |
| Composition 3, 50 g/kg. Water removed by RO membranes (t/d): 900<br>Reflux ratios for columns 1, 2: 2.12, 12, respectively. |       |       |         |        |        |        |   |   |
| Variable                                                                                                                    | 1     | 2     | 3       | 4      | 5      | 6      | 7 | 8 |
| Temperature (°C)                                                                                                            | 25    | 25    | 99.69   | 124.66 | 117.40 | 140.63 | - | - |
| Total flow rate (t/d)                                                                                                       | 1,000 | 100   | 50      | 50     | 30     | 20     | - | - |
| Composition (% w/w)                                                                                                         |       |       |         |        |        |        |   |   |
| Acetic                                                                                                                      | 3.00  | 30.00 | 0.477   | 59.51  | 99.00  | 0.31   | - | - |
| Lactic                                                                                                                      | 0     | 0     | 0       | 0      | 0      | 0      | - | - |
| Propionic                                                                                                                   | 2.00  | 20.00 | 0       | 40.00  | 0.208  | 99.69  | - | - |
| Water                                                                                                                       | 95.00 | 50.00 | 99.5226 | 0.486  | 0.796  | 0      | - | - |

| Composition 3, 100 g/kg. Water removed by RO membranes (t/d): 0   |       |       |         |        |        |        |   |   |
|-------------------------------------------------------------------|-------|-------|---------|--------|--------|--------|---|---|
| Reflux ratios for columns 1, 2: 1.06, 12, respectively.           |       |       |         |        |        |        |   |   |
| Variable                                                          | 1     | 2     | 3       | 4      | 5      | 6      | 7 | 8 |
| Temperature (°C)                                                  | 25    | 25    | 99.66   | 124.66 | 117.40 | 140.63 | - | - |
| Total flow rate (t/d)                                             | 1,000 | 1,000 | 1,000   | 100    | 60     | 40     | - | - |
| Composition (% w/w)                                               |       |       |         |        |        |        |   |   |
| Acetic                                                            | 6.00  | 6.00  | 0.0531  | 59.52  | 99.00  | 0.31   | - | - |
| Lactic                                                            | 0     | 0     | 0       | 0      | 0      | 0      | - | - |
| Propionic                                                         | 4.00  | 4.00  | 0       | 40.00  | 0.208  | 99.69  | - | - |
| Water                                                             | 90.00 | 90.00 | 99.9469 | 0.478  | 0.796  | 0      | - | - |
| Composition 3, 100 g/kg. Water removed by RO membranes (t/d): 100 |       |       |         |        |        |        |   |   |
| Reflux ratios for columns 1, 2: 1.08, 12, respectively.           |       |       |         |        |        |        |   |   |
| Variable                                                          | 1     | 2     | 3       | 4      | 5      | 6      | 7 | 8 |
| Temperature (°C)                                                  | 25    | 25    | 99.66   | 124.66 | 117.40 | 140.63 | - | - |
| Total flow rate (t/d)                                             | 1,000 | 900   | 800     | 100    | 60     | 40     | - | - |
| Composition (% w/w)                                               |       |       |         |        |        |        |   |   |
| Acetic                                                            | 6.00  | 6.67  | 0.05962 | 59.52  | 99.00  | 0.31   | - | - |
| Lactic                                                            | 0     | 0     | 0       | 0      | 0      | 0      | - | - |
| Propionic                                                         | 4.00  | 4.44  | 0       | 40.00  | 0.208  | 99.69  | - | - |
| Water                                                             | 90.00 | 88.89 | 99.9404 | 0.478  | 0.796  | 0      | - | - |
| Composition 3, 100 g/kg. Water removed by RO membranes (t/d): 200 |       |       |         |        |        |        |   |   |
| Reflux ratios for columns 1, 2: 1.10, 12, respectively.           |       |       |         |        |        |        |   |   |
| Variable                                                          | 1     | 2     | 3       | 4      | 5      | 6      | 7 | 8 |
| Temperature (°C)                                                  | 25    | 25    | 99.66   | 124.66 | 117.40 | 140.63 | - | - |
| Total flow rate (t/d)                                             | 1,000 | 800   | 700     | 100    | 60     | 40     | - | - |
| Composition (% w/w)                                               |       |       |         |        |        |        |   |   |
| Acetic                                                            | 6.00  | 7.50  | 0.0681  | 59.52  | 99.00  | 0.31   | - | - |
| Lactic                                                            | 0     | 0     | 0       | 0      | 0      | 0      | - | - |
| Propionic                                                         | 4.00  | 5.00  | 0       | 40.00  | 0.208  | 99.69  | - | - |
| Water                                                             | 90.00 | 87.50 | 99.9319 | 0.478  | 0.796  | 0      | - | - |
| Composition 3, 100 g/kg. Water removed by RO membranes (t/d): 300 |       |       |         |        |        |        |   |   |
| Reflux ratios for columns 1, 2: 1.20, 11, respectively.           |       |       |         |        |        |        |   |   |
| Variable                                                          | 1     | 2     | 3       | 4      | 5      | 6      | 7 | 8 |
| Temperature (°C)                                                  | 25    | 25    | 99.66   | 124.66 | 117.40 | 140.63 | - | - |
| Total flow rate (t/d)                                             | 1,000 | 700   | 600     | 100    | 60     | 40     | - | - |
| Composition (% w/w)                                               |       |       |         |        |        |        |   |   |
| Acetic                                                            | 6.00  | 8.57  | 0.0777  | 59.52  | 99.00  | 0.31   | - | - |
| Lactic                                                            | 0     | 0     | 0       | 0      | 0      | 0      | - | - |
| Propionic                                                         | 4.00  | 5.71  | 0       | 40.00  | 0.208  | 99.69  | - | - |
| Water                                                             | 90.00 | 85.71 | 99.9223 | 0.478  | 0.796  | 0      | - | - |
| Composition 3, 100 g/kg. Water removed by RO membranes (t/d): 400 |       |       |         |        |        |        |   |   |
| Reflux ratios for columns 1, 2: 1.24, 11, respectively.           |       |       |         |        |        |        |   |   |
| Variable                                                          | 1     | 2     | 3       | 4      | 5      | 6      | 7 | 8 |
| Temperature (°C)                                                  | 25    | 25    | 99.66   | 124.66 | 117.40 | 140.63 | - | - |
| Total flow rate (t/d)                                             | 1,000 | 600   | 500     | 100    | 60     | 40     | - | - |
| Composition (% w/w)                                               |       |       |         |        |        |        |   |   |
| Acetic                                                            | 6.00  | 10.00 | 0.0934  | 59.52  | 99.00  | 0.31   | - | - |
| Lactic                                                            | 0     | 0     | 0       | 0      | 0      | 0      | - | - |
| Propionic                                                         | 4.00  | 6.67  | 0       | 40.00  | 0.208  | 99.69  | - | - |
| Water                                                             | 90.00 | 83.33 | 99.9066 | 0.478  | 0.796  | 0      | - | - |

| Composition 3, 100 g/kg. Water removed by RO membranes (t/d): 500<br>Reflux ratios for columns 1, 2: 1.31, 11, respectively. |       |       |         |        |        |        |   |   |
|------------------------------------------------------------------------------------------------------------------------------|-------|-------|---------|--------|--------|--------|---|---|
| Variable                                                                                                                     | 1     | 2     | 3       | 4      | 5      | 6      | 7 | 8 |
| Temperature (°C)                                                                                                             | 25    | 25    | 99.67   | 124.66 | 117.40 | 140.63 | - | - |
| Total flow rate (t/d)                                                                                                        | 1,000 | 500   | 400     | 100    | 60     | 40     | - | - |
| Composition (% w/w)                                                                                                          |       |       |         |        |        |        |   |   |
| Acetic                                                                                                                       | 6.00  | 12.00 | 0.1165  | 59.52  | 99.00  | 0.31   | - | - |
| Lactic                                                                                                                       | 0     | 0     | 0       | 0      | 0      | 0      | - | - |
| Propionic                                                                                                                    | 4.00  | 8.00  | 0       | 40.00  | 0.208  | 99.69  | - | - |
| Water                                                                                                                        | 90.00 | 80.00 | 99.8835 | 0.478  | 0.796  | 0      | - | - |
| Composition 3, 100 g/kg. Water removed by RO membranes (t/d): 600<br>Reflux ratios for columns 1, 2: 1.42, 11, respectively. |       |       |         |        |        |        |   |   |
| Variable                                                                                                                     | 1     | 2     | 3       | 4      | 5      | 6      | 7 | 8 |
| Temperature (°C)                                                                                                             | 25    | 25    | 99.67   | 124.66 | 117.40 | 140.63 | - | - |
| Total flow rate (t/d)                                                                                                        | 1,000 | 400   | 300     | 100    | 60     | 40     | - | - |
| Composition (% w/w)                                                                                                          |       |       |         |        |        |        |   |   |
| Acetic                                                                                                                       | 6.00  | 15.00 | 0.155   | 59.52  | 99.00  | 0.31   | - | - |
| Lactic                                                                                                                       | 0     | 0     | 0       | 0      | 0      | 0      | - | - |
| Propionic                                                                                                                    | 4.00  | 10.00 | 0       | 40.00  | 0.208  | 99.69  | - | - |
| Water                                                                                                                        | 90.00 | 75.00 | 99.8447 | 0.478  | 0.796  | 0      | - | - |
| Composition 3, 100 g/kg. Water removed by RO membranes (t/d): 700<br>Reflux ratios for columns 1, 2: 1.63, 11, respectively. |       |       |         |        |        |        |   |   |
| Variable                                                                                                                     | 1     | 2     | 3       | 4      | 5      | 6      | 7 | 8 |
| Temperature (°C)                                                                                                             | 25    | 25    | 99.67   | 124.67 | 117.40 | 140.62 | - | - |
| Total flow rate (t/d)                                                                                                        | 1,000 | 300   | 200     | 100    | 60     | 40     | - | - |
| Composition (% w/w)                                                                                                          |       |       |         |        |        |        |   |   |
| Acetic                                                                                                                       | 6.00  | 20.00 | 0.2332  | 59.52  | 99.00  | 0.31   | - | - |
| Lactic                                                                                                                       | 0     | 0     | 0       | 0      | 0      | 0      | - | - |
| Propionic                                                                                                                    | 4.00  | 13.33 | 0       | 40.00  | 0.208  | 99.69  | - | - |
| Water                                                                                                                        | 90.00 | 66.67 | 99.7668 | 0.478  | 0.796  | 0      | - | - |
| Composition 3, 100 g/kg. Water removed by RO membranes (t/d): 800<br>Reflux ratios for columns 1, 2: 2.22, 11, respectively. |       |       |         |        |        |        |   |   |
| Variable                                                                                                                     | 1     | 2     | 3       | 4      | 5      | 6      | 7 | 8 |
| Temperature (°C)                                                                                                             | 25    | 25    | 99.69   | 124.67 | 117.40 | 140.62 | - | - |
| Total flow rate (t/d)                                                                                                        | 1,000 | 200   | 100     | 100    | 60     | 40     | - | - |
| Composition (% w/w)                                                                                                          |       |       |         |        |        |        |   |   |
| Acetic                                                                                                                       | 6.00  | 30.00 | 0.4663  | 59.53  | 99.00  | 0.31   | - | - |
| Lactic                                                                                                                       | 0     | 0     | 0       | 0      | 0      | 0      | - | - |
| Propionic                                                                                                                    | 4.00  | 20.00 | 0       | 40.00  | 0.226  | 99.69  | - | - |
| Water                                                                                                                        | 90.00 | 50.00 | 99.5337 | 0.466  | 0.777  | 0      | - | - |
| Composition 3, 100 g/kg. Water removed by RO membranes (t/d): 900<br>Reflux ratios for column 2: 5.1                         |       |       |         |        |        |        |   |   |
| Variable                                                                                                                     | 1     | 2     | 3       | 4      | 5      | 6      | 7 | 8 |
| Temperature (°C)                                                                                                             | 25    | 25    | -       | -      | 117.68 | 140.41 | - | - |
| Total flow rate (t/d)                                                                                                        | 1,000 | 100   | -       | -      | 60     | 40     | - | - |
| Composition (% w/w)                                                                                                          |       |       |         |        |        |        |   |   |
| Acetic                                                                                                                       | 6.00  | 60    | -       | -      | 99.35  | 0.973  | - | - |
| Lactic                                                                                                                       | 0     | 0     | -       | -      | 0      | 0      | - | - |
| Propionic                                                                                                                    | 4.00  | 40    | -       | -      | 0.65   | 99.03  | - | - |
| Water                                                                                                                        | 90.00 | 0     | -       | -      | 0      | 0      | - | - |
